# Supplementary material for: Gut Microbiome and Metabolome Profiles Associated with High-Fat Diet in Mice
Source: Metabolites. 2021 Jul 27;11(8):482. doi: 10.3390/metabo11080482 (PMC8398001; doi:10.3390/metabo11080482)
Supplement: Supplementary file 1 [file metabolites-11-00482-s001.zip › Supplementary Table1.xlsx]

## Sheet: Sheet
KEGG Pathway	Average value of CON group	Average value of HFD group	p value	FDR (0.05)	HFD/CON
Metabolism;Amino Acid Metabolism	0.108368	0.0923942	3.39243e-05	0.0121212	0.852598	***
Genetic Information Processing;Replication and Repair	0.0988214	0.0870864	0.00169315	0.0287879	0.88125	**
Environmental Information Processing;Membrane Transport	0.0708146	0.128647	4.38376e-07	0.00151515	1.81668	***
Metabolism;Energy Metabolism	0.0671815	0.0560148	6.90718e-05	0.0136364	0.833784	***
Genetic Information Processing;Translation	0.0642812	0.0562304	0.00719844	0.0287879	0.874757	**
Metabolism;Metabolism of Cofactors and Vitamins	0.0475887	0.0407876	5.62863e-05	0.0106061	0.857086	***
Metabolism;Nucleotide Metabolism	0.0453265	0.0405042	0.0301571	0.0318182	0.893609	*
Metabolism;Glycan Biosynthesis and Metabolism	0.0392786	0.0218953	8.2316e-06	0.00606061	0.557436	***
Genetic Information Processing;Folding, Sorting and Degradation	0.0288987	0.0237272	2.3289e-06	0.00151515	0.821046	***
Metabolism;Enzyme Families	0.0229496	0.0208678	6.35519e-05	0.00757576	0.909289	***
Genetic Information Processing;Transcription	0.0201068	0.028953	1.44691e-05	0.00606061	1.43996	***
Metabolism;Metabolism of Terpenoids and Polyketides	0.0185982	0.0166839	0.0071173	0.019697	0.897069	**
Metabolism;Metabolism of Other Amino Acids	0.0168078	0.0146492	0.00102555	0.0151515	0.871575	**
Metabolism;Xenobiotics Biodegradation and Metabolism	0.0142668	0.0195449	0.000163559	0.00909091	1.36996	***
Environmental Information Processing;Signal Transduction	0.0126316	0.0185723	0.00049381	0.00909091	1.4703	***
Metabolism;Biosynthesis of Other Secondary Metabolites	0.0119537	0.00813459	1.42884e-05	0.00454545	0.680507	***
Cellular Processes;Cell Motility	0.00887568	0.0230817	0.000625567	0.00757576	2.60056	***
Cellular Processes;Transport and Catabolism	0.00663474	0.00306814	6.53839e-06	0.0030303	0.462436	***
Cellular Processes;Cell Growth and Death	0.00585613	0.00510805	0.0014655	0.00757576	0.872257	**
Organismal Systems;Endocrine System	0.00343452	0.002608	0.000681185	0.00606061	0.759351	***
Human Diseases;Metabolic Diseases	0.00150698	0.000980786	5.56296e-06	0.00151515	0.650831	***
Organismal Systems;Environmental Adaptation	0.00127242	0.00155094	0.00377963	0.00454545	1.21889	**
Organismal Systems;Immune System	0.00106096	0.000727323	8.89356e-05	0.00151515	0.685531	***
Organismal Systems;Digestive System	0.000504652	0.00024803	0.000151653	0.00151515	0.491487	***
False discovery rate (FDR). The false discovery rate at 5% was applied to all tests to correct for multiple testing.
Symbols (*) indicate significant difference (* p < 0.05; ** p < 0.01; *** p < 0.001).
