# Supplementary material for: Gut Microbiome and Metabolome Profiles Associated with High-Fat Diet in Mice
Source: Metabolites. 2021 Jul 27;11(8):482. doi: 10.3390/metabo11080482 (PMC8398001; doi:10.3390/metabo11080482)
Supplement: Supplementary file 1 [file metabolites-11-00482-s001.zip › Supplementary Table2.xlsx]

## Sheet: Sheet1
KEGG Pathway	Average value of CON group	Average value of HFD group	p value	FDR (0.05)	HFD/CON
[["Genetic Information Processing", "Replication and Repair", "Chromosome"], ["Genetic Information Processing", "Translation", "Ribosome Biogenesis"]];Other;Other	0.000861171	0.000681004	0.0320833	0.0322242	1.26456	*
[["Human Diseases", "Neurodegenerative Diseases", "Amyotrophic lateral sclerosis (ALS)"], ["Metabolism", "Amino Acid Metabolism", "Tryptophan metabolism"], ["Cellular Processes", "Transport and Catabolism", "Peroxisome"], ["Metabolism", "Energy Metabolism", "Methane metabolism"]];Other;Other	0.000722813	0.0004156	0.0233686	0.030648	1.7392	*
[["Metabolism", "Carbohydrate Metabolism", "Amino sugar and nucleotide sugar metabolism"], ["Metabolism", "Carbohydrate Metabolism", "Starch and sucrose metabolism"], ["Metabolism", "Carbohydrate Metabolism", "Fructose and mannose metabolism"]];Other;Other	0.000913606	0.000752716	0.0243801	0.0307356	1.21375	*
[["Metabolism", "Carbohydrate Metabolism", "Pentose phosphate pathway"], ["Metabolism", "Energy Metabolism", "Carbon fixation in photosynthetic organisms"], ["Metabolism", "Carbohydrate Metabolism", "Pentose and glucuronate interconversions"]];Other;Other	0.000949005	0.000841761	0.0260423	0.030648	1.1274	*
[["Metabolism", "Carbohydrate Metabolism", "Pyruvate metabolism"], ["Metabolism", "Amino Acid Metabolism", "Arginine and proline metabolism"]];Other;Other	0.00103127	0.000749489	0.0190787	0.0294221	1.37596	*
[["Metabolism", "Energy Metabolism", "Photosynthesis proteins"], ["Metabolism", "Energy Metabolism", "Oxidative phosphorylation"], ["Metabolism", "Energy Metabolism", "Photosynthesis"]];Other;Other	0.00598073	0.00493907	0.0102565	0.0268827	1.2109	*
[["Metabolism", "Enzyme Families", "Peptidases"], ["Genetic Information Processing", "Replication and Repair", "DNA repair and recombination proteins"]];Other;Other	0.000946544	0.000787135	0.0151163	0.0285464	1.20252	*
[["Metabolism", "Lipid Metabolism", "Glycerophospholipid metabolism"], ["Metabolism", "Lipid Metabolism", "Glycerolipid metabolism"], ["Metabolism", "Lipid Metabolism", "Lipid biosynthesis proteins"]];Other;Other	0.00277786	0.00244895	0.00884563	0.0260946	1.1343	**
[["Metabolism", "Metabolism of Cofactors and Vitamins", "One carbon pool by folate"], ["Metabolism", "Energy Metabolism", "Carbon fixation pathways in prokaryotes"]];Other;Other	0.00265146	0.00224107	0.0152997	0.0279335	1.18313	*
[["Metabolism", "Metabolism of Cofactors and Vitamins", "Pantothenate and CoA biosynthesis"], ["Metabolism", "Amino Acid Metabolism", "Valine, leucine and isoleucine biosynthesis"]];Other;Other	0.00189786	0.00133613	0.00710825	0.0253065	1.42042	**
[["Metabolism", "Metabolism of Other Amino Acids", "D-Alanine metabolism"]];Other;Other	0.000921564	0.000834564	0.010826	0.0267075	1.10425	*
[["Metabolism", "Metabolism of Other Amino Acids", "Phosphonate and phosphinate metabolism"]];Other;Other	0.00104228	0.000835444	0.0223683	0.0281086	1.24758	*
[["Metabolism", "Metabolism of Terpenoids and Polyketides", "Geraniol degradation"], ["Metabolism", "Xenobiotics Biodegradation and Metabolism", "Naphthalene degradation"]];Other;Other	0.000789668	0.00038791	0.00456942	0.02338	2.0357	**
[["Metabolism", "Metabolism of Terpenoids and Polyketides", "Limonene and pinene degradation"], ["Metabolism", "Amino Acid Metabolism", "Tryptophan metabolism"], ["Metabolism", "Xenobiotics Biodegradation and Metabolism", "Chloroalkane and chloroalkene degradation"], ["Metabolism", "Carbohydrate Metabolism", "Pentose and glucuronate interconversions"], ["Metabolism", "Lipid Metabolism", "Fatty ac…	0.000734399	0.000451146	0.0138117	0.0270578	1.62785	*
[["Metabolism", "Nucleotide Metabolism", "Pyrimidine metabolism"], ["Genetic Information Processing", "Replication and Repair", "DNA repair and recombination proteins"], ["Metabolism", "Nucleotide Metabolism", "Purine metabolism"], ["Genetic Information Processing", "Replication and Repair", "Homologous recombination"], ["Genetic Information Processing", "Replication and Repair", "Nucleotide exci…	0.000923687	0.000815201	0.00947079	0.0259194	1.13308	**
[["Metabolism", "Nucleotide Metabolism", "Pyrimidine metabolism"]];Other;Other	0.00905768	0.00768316	0.0053268	0.0238179	1.1789	**
[["Metabolism", "Xenobiotics Biodegradation and Metabolism", "Aminobenzoate degradation"], ["Environmental Information Processing", "Signal Transduction", "Two-component system"], ["Metabolism", "Metabolism of Cofactors and Vitamins", "Folate biosynthesis"]];Other;Other	0.000841995	0.000448935	0.00109946	0.0174256	1.87554	**
[["Metabolism", "Xenobiotics Biodegradation and Metabolism", "Benzoate degradation"]];Other;Other	0.000767872	0.000520096	0.00999348	0.0257443	1.4764	**
[["Organismal Systems", "Endocrine System", "Insulin signaling pathway"], ["Metabolism", "Carbohydrate Metabolism", "Starch and sucrose metabolism"]];Other;Other	0.000988761	0.000750634	0.0137871	0.0258319	1.31723	*
[["Organismal Systems", "Environmental Adaptation", "Plant-pathogen interaction"], ["Genetic Information Processing", "Translation", "Translation factors"]];Other;Other	0.000914175	0.000760563	0.00111174	0.017338	1.20197	**
[["Organismal Systems", "Excretory System", "Proximal tubule bicarbonate reclamation"], ["Metabolism", "Amino Acid Metabolism", "Arginine and proline metabolism"], ["Organismal Systems", "Nervous System", "Glutamatergic synapse"], ["Metabolism", "Metabolism of Other Amino Acids", "D-Glutamine and D-glutamate metabolism"], ["Metabolism", "Amino Acid Metabolism", "Alanine, aspartate and glutamate m…	0.000770332	0.000359484	0.000561656	0.0146235	2.14288	***
[["Cellular Processes", "Cell Growth and Death", "Cell cycle - Caulobacter"], ["Genetic Information Processing", "Replication and Repair", "DNA replication"], ["Genetic Information Processing", "Replication and Repair", "DNA replication proteins"]];Other;Other	0.000970647	0.000849971	0.0109559	0.0251313	1.14198	*
[["Cellular Processes", "Cell Growth and Death", "Cell cycle - Caulobacter"], ["Metabolism", "Glycan Biosynthesis and Metabolism", "Peptidoglycan biosynthesis"]];Other;Other	0.000903536	0.000733798	0.000309845	0.012697	1.23132	***
[["Cellular Processes", "Transport and Catabolism", "Lysosome"], ["Environmental Information Processing", "Signaling Molecules and Interaction", "Bacterial toxins"], ["Metabolism", "Lipid Metabolism", "Sphingolipid metabolism"], ["Metabolism", "Glycan Biosynthesis and Metabolism", "Other glycan degradation"]];Other;Other	0.000814071	0.000302916	0.000192482	0.010683	2.68745	***
[["Cellular Processes", "Transport and Catabolism", "Lysosome"], ["Metabolism", "Glycan Biosynthesis and Metabolism", "Other glycan degradation"]];Other;Other	0.000798046	0.000380835	0.000127925	0.00980736	2.09552	***
[["Environmental Information Processing", "Membrane Transport", "ABC transporters"], ["Genetic Information Processing", "Replication and Repair", "Chromosome"], ["Environmental Information Processing", "Membrane Transport", "Transporters"]];Other;Other	0.000874352	0.000620677	0.00224454	0.0186515	1.40871	**
[["Environmental Information Processing", "Membrane Transport", "Secretion system"], ["Environmental Information Processing", "Membrane Transport", "ABC transporters"], ["Genetic Information Processing", "Replication and Repair", "Chromosome"], ["Environmental Information Processing", "Membrane Transport", "Transporters"]];Other;Other	0.000864811	0.000630863	0.00404157	0.0202277	1.37084	**
[["Environmental Information Processing", "Membrane Transport", "Secretion system"], ["Genetic Information Processing", "Folding, Sorting and Degradation", "Protein export"], ["Environmental Information Processing", "Membrane Transport", "Bacterial secretion system"]];Other;Other	0.00978844	0.00748973	7.72838e-06	0.00429072	1.30691	***
[["Environmental Information Processing", "Membrane Transport", "Secretion system"], ["Human Diseases", "Infectious Diseases", "Pertussis"], ["Environmental Information Processing", "Membrane Transport", "Bacterial secretion system"]];Other;Other	0.000739467	0.000160196	6.85549e-05	0.00805604	4.616	***
[["Environmental Information Processing", "Membrane Transport", "Secretion system"], ["Metabolism", "Nucleotide Metabolism", "Pyrimidine metabolism"]];Other;Other	0.000899148	0.000734041	0.000468605	0.0127846	1.22493	***
[["Environmental Information Processing", "Signal Transduction", "MAPK signaling pathway - yeast"], ["Metabolism", "Carbohydrate Metabolism", "Pyruvate metabolism"]];Other;Other	0.00156235	0.00079473	1.26469e-05	0.00472855	1.96589	***
[["Environmental Information Processing", "Signal Transduction", "Phosphatidylinositol signaling system"], ["Metabolism", "Lipid Metabolism", "Glycerophospholipid metabolism"]];Other;Other	0.000957861	0.000804114	0.00143472	0.0160245	1.1912	**
[["Environmental Information Processing", "Signaling Molecules and Interaction", "Cellular antigens"], ["Metabolism", "Nucleotide Metabolism", "Pyrimidine metabolism"], ["Metabolism", "Metabolism of Cofactors and Vitamins", "Nicotinate and nicotinamide metabolism"], ["Metabolism", "Nucleotide Metabolism", "Purine metabolism"]];Other;Other	0.000733353	0.000380212	0.000791727	0.0140105	1.9288	***
[["Genetic Information Processing", "Folding, Sorting and Degradation", "Chaperones and folding catalysts"], ["Genetic Information Processing", "Folding, Sorting and Degradation", "Protein processing in endoplasmic reticulum"]];Other;Other	0.000918187	0.000589562	0.000389703	0.0118214	1.5574	***
[["Genetic Information Processing", "Folding, Sorting and Degradation", "Chaperones and folding catalysts"], ["Human Diseases", "Infectious Diseases", "Tuberculosis"], ["Genetic Information Processing", "Folding, Sorting and Degradation", "RNA degradation"]];Other;Other	0.000971673	0.000850862	0.00237207	0.0174256	1.14199	**
[["Genetic Information Processing", "Folding, Sorting and Degradation", "Chaperones and folding catalysts"], ["Human Diseases", "Metabolic Diseases", "Type I diabetes mellitus"], ["Human Diseases", "Infectious Diseases", "Tuberculosis"], ["Genetic Information Processing", "Folding, Sorting and Degradation", "RNA degradation"]];Other;Other	0.00090363	0.00073262	0.000317923	0.011296	1.23342	***
[["Genetic Information Processing", "Folding, Sorting and Degradation", "Chaperones and folding catalysts"], ["Metabolism", "Energy Metabolism", "Photosynthesis proteins"], ["Metabolism", "Energy Metabolism", "Oxidative phosphorylation"], ["Metabolism", "Energy Metabolism", "Photosynthesis"]];Other;Other	0.000849963	0.000688159	0.00734803	0.0204028	1.23513	**
[["Genetic Information Processing", "Folding, Sorting and Degradation", "Chaperones and folding catalysts"]];Other;Other	0.0111178	0.00914283	1.69833e-06	0.00175131	1.21601	***
[["Genetic Information Processing", "Folding, Sorting and Degradation", "Protein processing in endoplasmic reticulum"], ["Genetic Information Processing", "Folding, Sorting and Degradation", "Proteasome"], ["Organismal Systems", "Immune System", "Antigen processing and presentation"], ["Organismal Systems", "Endocrine System", "Progesterone-mediated oocyte maturation"], ["Human Diseases", "Cancer…	0.000901512	0.000566237	4.09208e-06	0.00323993	1.59211	***
[["Genetic Information Processing", "Folding, Sorting and Degradation", "Sulfur relay system"]];Other;Other	0.00176955	0.00122386	2.30681e-05	0.00551664	1.44587	***
[["Genetic Information Processing", "Replication and Repair", "Base excision repair"], ["Genetic Information Processing", "Replication and Repair", "DNA repair and recombination proteins"], ["Human Diseases", "Immune System Diseases", "Primary immunodeficiency"]];Other;Other	0.000760778	0.000479553	0.00320728	0.017951	1.58643	**
[["Genetic Information Processing", "Replication and Repair", "Base excision repair"], ["Genetic Information Processing", "Replication and Repair", "Mismatch repair"], ["Genetic Information Processing", "Replication and Repair", "Homologous recombination"], ["Genetic Information Processing", "Replication and Repair", "DNA repair and recombination proteins"]];Other;Other	0.000903534	0.000681936	9.07674e-07	0.00105079	1.32495	***
[["Genetic Information Processing", "Replication and Repair", "Chromosome"], ["Cellular Processes", "Cell Growth and Death", "Cell cycle - Caulobacter"], ["Cellular Processes", "Cell Motility", "Cytoskeleton proteins"]];Other;Other	0.000905787	0.000721777	0.000286083	0.0105079	1.25494	***
[["Genetic Information Processing", "Replication and Repair", "Chromosome"], ["Cellular Processes", "Cell Growth and Death", "Cell cycle - Caulobacter"]];Other;Other	0.00246858	0.00197779	0.00578593	0.0190018	1.24815	**
[["Genetic Information Processing", "Replication and Repair", "Chromosome"], ["Environmental Information Processing", "Signal Transduction", "Two-component system"], ["Cellular Processes", "Cell Growth and Death", "Cell cycle - Caulobacter"], ["Genetic Information Processing", "Replication and Repair", "DNA replication proteins"]];Other;Other	0.000906764	0.000768757	0.00256102	0.0171629	1.17952	**
[["Genetic Information Processing", "Replication and Repair", "Chromosome"], ["Genetic Information Processing", "Replication and Repair", "DNA repair and recombination proteins"], ["Genetic Information Processing", "Replication and Repair", "DNA replication proteins"]];Other;Other	0.00243474	0.00126358	2.73686e-06	0.00218914	1.92686	***
[["Genetic Information Processing", "Replication and Repair", "Chromosome"], ["Genetic Information Processing", "Replication and Repair", "DNA replication proteins"]];Other;Other	0.00153374	0.000684752	0.000106206	0.00849387	2.23984	***
[["Genetic Information Processing", "Replication and Repair", "Chromosome"], ["Metabolism", "Glycan Biosynthesis and Metabolism", "Peptidoglycan biosynthesis"]];Other;Other	0.000733427	0.000225996	0.00012742	0.008669	3.2453	***
[["Genetic Information Processing", "Replication and Repair", "DNA repair and recombination proteins"], ["Genetic Information Processing", "Folding, Sorting and Degradation", "RNA degradation"]];Other;Other	0.00158419	0.000840949	3.24782e-05	0.00604203	1.88382	***
[["Genetic Information Processing", "Replication and Repair", "DNA replication"], ["Genetic Information Processing", "Replication and Repair", "DNA replication proteins"]];Other;Other	0.00272082	0.00228059	0.000153922	0.0089317	1.19303	***
[["Genetic Information Processing", "Replication and Repair", "Homologous recombination"], ["Genetic Information Processing", "Replication and Repair", "DNA repair and recombination proteins"]];Other;Other	0.00913493	0.00698401	2.87654e-06	0.00245184	1.30798	***
[["Genetic Information Processing", "Replication and Repair", "Mismatch repair"], ["Genetic Information Processing", "Replication and Repair", "DNA repair and recombination proteins"]];Other;Other	0.00440562	0.00333481	0.00063674	0.0121716	1.3211	***
[["Genetic Information Processing", "Replication and Repair", "Mismatch repair"], ["Genetic Information Processing", "Replication and Repair", "Homologous recombination"], ["Genetic Information Processing", "Replication and Repair", "DNA repair and recombination proteins"], ["Genetic Information Processing", "Replication and Repair", "DNA replication"], ["Genetic Information Processing", "Replica…	0.00177972	0.00146655	0.00419886	0.0176007	1.21354	**
[["Genetic Information Processing", "Replication and Repair", "Nucleotide excision repair"], ["Genetic Information Processing", "Replication and Repair", "DNA repair and recombination proteins"]];Other;Other	0.00442215	0.0029714	4.46084e-06	0.00288967	1.48824	***
[["Genetic Information Processing", "Transcription", "Transcription factors"], ["Genetic Information Processing", "Replication and Repair", "Chromosome"], ["Cellular Processes", "Cell Motility", "Cytoskeleton proteins"]];Other;Other	0.00190773	0.00155333	0.00991582	0.0190893	1.22816	**
[["Genetic Information Processing", "Transcription", "Transcription machinery"], ["Genetic Information Processing", "Folding, Sorting and Degradation", "RNA degradation"]];Other;Other	0.000855924	0.000569372	0.0022958	0.015324	1.50328	**
[["Genetic Information Processing", "Transcription", "Transcription machinery"], ["Human Diseases", "Infectious Diseases", "Vibrio cholerae pathogenic cycle"], ["Environmental Information Processing", "Signal Transduction", "Two-component system"]];Other;Other	0.000787408	0.00045736	0.00014492	0.00831874	1.72163	***
[["Genetic Information Processing", "Translation", "Aminoacyl-tRNA biosynthesis"], ["Metabolism", "Amino Acid Metabolism", "Amino acid related enzymes"], ["Metabolism", "Amino Acid Metabolism", "Tryptophan metabolism"]];Other;Other	0.000899928	0.000739086	0.000686818	0.0117338	1.21762	***
[["Genetic Information Processing", "Translation", "Aminoacyl-tRNA biosynthesis"], ["Metabolism", "Amino Acid Metabolism", "Amino acid related enzymes"], ["Metabolism", "Amino Acid Metabolism", "Valine, leucine and isoleucine biosynthesis"]];Other;Other	0.00273853	0.00230159	0.000633356	0.0114711	1.18984	***
[["Genetic Information Processing", "Translation", "Aminoacyl-tRNA biosynthesis"], ["Metabolism", "Amino Acid Metabolism", "Amino acid related enzymes"], ["Metabolism", "Metabolism of Cofactors and Vitamins", "Porphyrin and chlorophyll metabolism"]];Other;Other	0.000909839	0.000636947	9.59298e-08	8.75657e-05	1.42844	***
[["Genetic Information Processing", "Translation", "Aminoacyl-tRNA biosynthesis"], ["Metabolism", "Amino Acid Metabolism", "Amino acid related enzymes"]];Other;Other	0.0136982	0.0117079	0.00255854	0.015324	1.16999	**
[["Genetic Information Processing", "Translation", "Aminoacyl-tRNA biosynthesis"], ["Metabolism", "Metabolism of Cofactors and Vitamins", "One carbon pool by folate"]];Other;Other	0.000907358	0.000778336	0.0026423	0.015324	1.16577	**
[["Genetic Information Processing", "Translation", "Ribosome Biogenesis"], ["Genetic Information Processing", "Folding, Sorting and Degradation", "RNA degradation"]];Other;Other	0.000852187	0.000645706	0.00666392	0.0168126	1.31978	**
[["Genetic Information Processing", "Translation", "Ribosome Biogenesis"], ["Genetic Information Processing", "Transcription", "Transcription machinery"]];Other;Other	0.00275576	0.00242298	0.0139063	0.0182137	1.13734	*
[["Genetic Information Processing", "Translation", "Ribosome Biogenesis"]];Other;Other	0.0204504	0.0177718	8.21445e-05	0.00691769	1.15072	***
[["Genetic Information Processing", "Translation", "Ribosome biogenesis in eukaryotes"], ["Genetic Information Processing", "Translation", "Ribosome Biogenesis"]];Other;Other	0.000907471	0.000739565	0.000438078	0.0103327	1.22703	***
[["Genetic Information Processing", "Translation", "Ribosome"]];Other;Other	0.0483788	0.0385765	0.000397192	0.00998249	1.2541	***
[["Genetic Information Processing", "Translation", "Translation factors"], ["Genetic Information Processing", "Translation", "RNA transport"]];Other;Other	0.000758593	0.000162557	2.42908e-06	0.00157618	4.66662	***
[["Genetic Information Processing", "Translation", "Translation factors"]];Other;Other	0.00990368	0.00785135	0.000132383	0.00761821	1.2614	***
[["Human Diseases", "Neurodegenerative Diseases", "Huntington's disease"], ["Cellular Processes", "Transport and Catabolism", "Peroxisome"]];Other;Other	0.000824494	0.000341699	0.00029481	0.0089317	2.41292	***
[["Metabolism", "Amino Acid Metabolism", "Alanine, aspartate and glutamate metabolism"], ["Metabolism", "Energy Metabolism", "Nitrogen metabolism"]];Other;Other	0.00344848	0.00214684	2.73582e-05	0.00490368	1.60631	***
[["Metabolism", "Amino Acid Metabolism", "Alanine, aspartate and glutamate metabolism"], ["Metabolism", "Nucleotide Metabolism", "Purine metabolism"]];Other;Other	0.00180859	0.00148289	0.000505987	0.0100701	1.21964	***
[["Metabolism", "Amino Acid Metabolism", "Amino acid related enzymes"], ["Metabolism", "Amino Acid Metabolism", "Arginine and proline metabolism"]];Other;Other	0.000788517	0.00039074	0.000266419	0.008669	2.01801	***
[["Metabolism", "Amino Acid Metabolism", "Amino acid related enzymes"], ["Metabolism", "Amino Acid Metabolism", "Glycine, serine and threonine metabolism"], ["Metabolism", "Energy Metabolism", "Methane metabolism"], ["Metabolism", "Metabolism of Cofactors and Vitamins", "Vitamin B6 metabolism"]];Other;Other	0.000843184	0.000528897	0.000195044	0.00796848	1.59423	***
[["Metabolism", "Amino Acid Metabolism", "Amino acid related enzymes"], ["Metabolism", "Amino Acid Metabolism", "Glycine, serine and threonine metabolism"]];Other;Other	0.000775438	0.000243985	1.03038e-05	0.00350263	3.17823	***
[["Metabolism", "Amino Acid Metabolism", "Amino acid related enzymes"], ["Metabolism", "Amino Acid Metabolism", "Valine, leucine and isoleucine degradation"], ["Metabolism", "Amino Acid Metabolism", "Valine, leucine and isoleucine biosynthesis"], ["Metabolism", "Metabolism of Cofactors and Vitamins", "Pantothenate and CoA biosynthesis"]];Other;Other	0.000952003	0.000748251	0.00834263	0.0160245	1.2723	**
[["Metabolism", "Amino Acid Metabolism", "Arginine and proline metabolism"], ["Metabolism", "Amino Acid Metabolism", "Alanine, aspartate and glutamate metabolism"], ["Metabolism", "Energy Metabolism", "Nitrogen metabolism"]];Other;Other	0.00156085	0.000695304	9.31e-05	0.00683012	2.24485	***
[["Metabolism", "Amino Acid Metabolism", "Cysteine and methionine metabolism"], ["Metabolism", "Amino Acid Metabolism", "Amino acid related enzymes"], ["Metabolism", "Energy Metabolism", "Sulfur metabolism"], ["Metabolism", "Metabolism of Other Amino Acids", "Selenocompound metabolism"], ["Metabolism", "Energy Metabolism", "Nitrogen metabolism"]];Other;Other	0.00083874	0.000634798	0.00324522	0.0140105	1.32127	**
[["Metabolism", "Amino Acid Metabolism", "Cysteine and methionine metabolism"], ["Metabolism", "Amino Acid Metabolism", "Lysine biosynthesis"], ["Metabolism", "Amino Acid Metabolism", "Glycine, serine and threonine metabolism"]];Other;Other	0.00347915	0.00244177	7.68544e-07	0.00061296	1.42485	***
[["Metabolism", "Amino Acid Metabolism", "Cysteine and methionine metabolism"], ["Metabolism", "Energy Metabolism", "Sulfur metabolism"]];Other;Other	0.00286173	0.00239752	0.000994985	0.0110333	1.19362	***
[["Metabolism", "Amino Acid Metabolism", "Cysteine and methionine metabolism"], ["Metabolism", "Metabolism of Cofactors and Vitamins", "One carbon pool by folate"], ["Metabolism", "Metabolism of Other Amino Acids", "Selenocompound metabolism"]];Other;Other	0.000953061	0.000735807	0.0124205	0.0155867	1.29526	*
[["Metabolism", "Amino Acid Metabolism", "Cysteine and methionine metabolism"]];Other;Other	0.00442645	0.00329373	2.78243e-06	0.00175131	1.3439	***
[["Metabolism", "Amino Acid Metabolism", "Glycine, serine and threonine metabolism"], ["Metabolism", "Metabolism of Cofactors and Vitamins", "Vitamin B6 metabolism"]];Other;Other	0.000902235	0.000677028	6.08497e-05	0.00595447	1.33264	***
[["Metabolism", "Amino Acid Metabolism", "Histidine metabolism"]];Other;Other	0.00762138	0.00605904	0.00290375	0.01331	1.25785	**
[["Metabolism", "Amino Acid Metabolism", "Lysine biosynthesis"], ["Metabolism", "Amino Acid Metabolism", "Arginine and proline metabolism"]];Other;Other	0.0035804	0.00244222	5.60598e-06	0.00262697	1.46604	***
[["Metabolism", "Amino Acid Metabolism", "Lysine biosynthesis"]];Other;Other	0.00547499	0.00445713	9.12608e-06	0.00315236	1.22837	***
[["Metabolism", "Amino Acid Metabolism", "Lysine degradation"], ["Metabolism", "Amino Acid Metabolism", "Lysine biosynthesis"]];Other;Other	0.000838081	0.000415717	1.06722e-06	0.000875657	2.01599	***
[["Metabolism", "Amino Acid Metabolism", "Phenylalanine, tyrosine and tryptophan biosynthesis"], ["Metabolism", "Amino Acid Metabolism", "Glycine, serine and threonine metabolism"]];Other;Other	0.00255505	0.00132405	1.60705e-07	0.000175131	1.92973	***
[["Metabolism", "Amino Acid Metabolism", "Phenylalanine, tyrosine and tryptophan biosynthesis"], ["Metabolism", "Biosynthesis of Other Secondary Metabolites", "Novobiocin biosynthesis"]];Other;Other	0.000881982	0.000593548	7.37505e-06	0.00271454	1.48595	***
[["Metabolism", "Amino Acid Metabolism", "Phenylalanine, tyrosine and tryptophan biosynthesis"]];Other;Other	0.0120516	0.00893559	0.00087835	0.00971979	1.34872	***
[["Metabolism", "Amino Acid Metabolism", "Tryptophan metabolism"], ["Metabolism", "Energy Metabolism", "Nitrogen metabolism"]];Other;Other	0.000710421	0.000107639	7.79233e-05	0.0058669	6.60001	***
[["Metabolism", "Amino Acid Metabolism", "Valine, leucine and isoleucine biosynthesis"]];Other;Other	0.00160456	0.00061718	3.22193e-07	0.000175131	2.59982	***
[["Metabolism", "Biosynthesis of Other Secondary Metabolites", "Isoquinoline alkaloid biosynthesis"], ["Metabolism", "Amino Acid Metabolism", "Cysteine and methionine metabolism"], ["Metabolism", "Energy Metabolism", "Carbon fixation in photosynthetic organisms"], ["Metabolism", "Biosynthesis of Other Secondary Metabolites", "Tropane, piperidine and pyridine alkaloid biosynthesis"], ["Metabolism"…	0.000828322	0.000609828	0.00130059	0.0103327	1.35829	**
[["Metabolism", "Biosynthesis of Other Secondary Metabolites", "Streptomycin biosynthesis"], ["Metabolism", "Biosynthesis of Other Secondary Metabolites", "Butirosin and neomycin biosynthesis"], ["Metabolism", "Carbohydrate Metabolism", "Starch and sucrose metabolism"], ["Metabolism", "Carbohydrate Metabolism", "Glycolysis / Gluconeogenesis"], ["Metabolism", "Carbohydrate Metabolism", "Galactose …	0.00179902	0.00105686	0.000240722	0.00709282	1.70223	***
[["Metabolism", "Biosynthesis of Other Secondary Metabolites", "Tropane, piperidine and pyridine alkaloid biosynthesis"], ["Metabolism", "Amino Acid Metabolism", "Phenylalanine metabolism"], ["Metabolism", "Amino Acid Metabolism", "Histidine metabolism"], ["Metabolism", "Amino Acid Metabolism", "Amino acid related enzymes"], ["Metabolism", "Amino Acid Metabolism", "Phenylalanine, tyrosine and try…	0.000901692	0.000680896	0.00047664	0.00823117	1.32427	***
[["Metabolism", "Biosynthesis of Other Secondary Metabolites", "beta-Lactam resistance"], ["Metabolism", "Biosynthesis of Other Secondary Metabolites", "Penicillin and cephalosporin biosynthesis"], ["Environmental Information Processing", "Signal Transduction", "Two-component system"]];Other;Other	0.000815949	0.000406052	0.000606313	0.00849387	2.00947	***
[["Metabolism", "Carbohydrate Metabolism", "Amino sugar and nucleotide sugar metabolism"], ["Metabolism", "Carbohydrate Metabolism", "Ascorbate and aldarate metabolism"], ["Metabolism", "Carbohydrate Metabolism", "Pentose and glucuronate interconversions"], ["Metabolism", "Carbohydrate Metabolism", "Starch and sucrose metabolism"]];Other;Other	0.00090551	0.000573277	8.02733e-07	0.000437828	1.57953	***
[["Metabolism", "Carbohydrate Metabolism", "Amino sugar and nucleotide sugar metabolism"], ["Metabolism", "Carbohydrate Metabolism", "Fructose and mannose metabolism"]];Other;Other	0.0050407	0.00239313	1.4094e-06	0.000788091	2.10632	***
[["Metabolism", "Carbohydrate Metabolism", "Amino sugar and nucleotide sugar metabolism"], ["Metabolism", "Enzyme Families", "Peptidases"], ["Metabolism", "Amino Acid Metabolism", "Alanine, aspartate and glutamate metabolism"]];Other;Other	0.000960417	0.000743458	5.38197e-05	0.00516637	1.29182	***
[["Metabolism", "Carbohydrate Metabolism", "Amino sugar and nucleotide sugar metabolism"], ["Metabolism", "Glycan Biosynthesis and Metabolism", "Lipopolysaccharide biosynthesis proteins"]];Other;Other	0.00163065	0.00107748	0.000331322	0.00726795	1.51339	***
[["Metabolism", "Carbohydrate Metabolism", "Butanoate metabolism"]];Other;Other	0.00152468	0.000794612	0.00027259	0.00665499	1.91877	***
[["Metabolism", "Carbohydrate Metabolism", "C5-Branched dibasic acid metabolism"], ["Metabolism", "Amino Acid Metabolism", "Valine, leucine and isoleucine biosynthesis"]];Other;Other	0.00362253	0.00266359	5.04355e-05	0.00472855	1.36002	***
[["Metabolism", "Carbohydrate Metabolism", "Citrate cycle (TCA cycle)"], ["Metabolism", "Carbohydrate Metabolism", "Glycolysis / Gluconeogenesis"], ["Metabolism", "Carbohydrate Metabolism", "Pyruvate metabolism"], ["Metabolism", "Amino Acid Metabolism", "Glycine, serine and threonine metabolism"], ["Metabolism", "Amino Acid Metabolism", "Valine, leucine and isoleucine degradation"]];Other;Other	0.000866669	0.000650851	0.00169835	0.00945709	1.33159	**
[["Metabolism", "Carbohydrate Metabolism", "Citrate cycle (TCA cycle)"], ["Metabolism", "Carbohydrate Metabolism", "Glycolysis / Gluconeogenesis"], ["Metabolism", "Carbohydrate Metabolism", "Pyruvate metabolism"], ["Metabolism", "Energy Metabolism", "Carbon fixation in photosynthetic organisms"]];Other;Other	0.000743934	0.000381359	0.000194289	0.0061296	1.95074	***
[["Metabolism", "Carbohydrate Metabolism", "Citrate cycle (TCA cycle)"], ["Metabolism", "Carbohydrate Metabolism", "Glyoxylate and dicarboxylate metabolism"]];Other;Other	0.000966179	0.00063411	2.01327e-05	0.00315236	1.52368	***
[["Metabolism", "Carbohydrate Metabolism", "Citrate cycle (TCA cycle)"], ["Metabolism", "Energy Metabolism", "Carbon fixation pathways in prokaryotes"], ["Cellular Processes", "Transport and Catabolism", "Peroxisome"], ["Metabolism", "Metabolism of Other Amino Acids", "Glutathione metabolism"]];Other;Other	0.000886707	0.000575505	5.46616e-07	0.000350263	1.54075	***
[["Metabolism", "Carbohydrate Metabolism", "Citrate cycle (TCA cycle)"], ["Metabolism", "Energy Metabolism", "Carbon fixation pathways in prokaryotes"], ["Metabolism", "Carbohydrate Metabolism", "Glyoxylate and dicarboxylate metabolism"]];Other;Other	0.00089739	0.000631885	3.25006e-05	0.00385289	1.42018	***
[["Metabolism", "Carbohydrate Metabolism", "Citrate cycle (TCA cycle)"], ["Metabolism", "Energy Metabolism", "Carbon fixation pathways in prokaryotes"], ["Metabolism", "Carbohydrate Metabolism", "Pyruvate metabolism"]];Other;Other	0.000792035	0.000373457	2.26578e-05	0.00315236	2.12082	***
[["Metabolism", "Carbohydrate Metabolism", "Citrate cycle (TCA cycle)"], ["Metabolism", "Energy Metabolism", "Carbon fixation pathways in prokaryotes"]];Other;Other	0.00572012	0.00269873	3.90863e-05	0.00394046	2.11956	***
[["Metabolism", "Carbohydrate Metabolism", "Glycolysis / Gluconeogenesis"], ["Metabolism", "Carbohydrate Metabolism", "Pyruvate metabolism"], ["Human Diseases", "Metabolic Diseases", "Type II diabetes mellitus"], ["Metabolism", "Energy Metabolism", "Carbon fixation in photosynthetic organisms"], ["Metabolism", "Nucleotide Metabolism", "Purine metabolism"]];Other;Other	0.000899323	0.000677331	4.65945e-05	0.00411559	1.32775	***
[["Metabolism", "Carbohydrate Metabolism", "Glycolysis / Gluconeogenesis"], ["Metabolism", "Energy Metabolism", "Carbon fixation in photosynthetic organisms"]];Other;Other	0.000907243	0.000737493	0.000401053	0.00647986	1.23017	***
[["Metabolism", "Carbohydrate Metabolism", "Glyoxylate and dicarboxylate metabolism"], ["Metabolism", "Amino Acid Metabolism", "Glycine, serine and threonine metabolism"], ["Metabolism", "Energy Metabolism", "Methane metabolism"]];Other;Other	0.000911722	0.00053268	2.76961e-06	0.00105079	1.71157	***
[["Metabolism", "Carbohydrate Metabolism", "Glyoxylate and dicarboxylate metabolism"], ["Metabolism", "Energy Metabolism", "Carbon fixation in photosynthetic organisms"], ["Metabolism", "Carbohydrate Metabolism", "Citrate cycle (TCA cycle)"], ["Metabolism", "Energy Metabolism", "Carbon fixation pathways in prokaryotes"], ["Metabolism", "Carbohydrate Metabolism", "Pyruvate metabolism"], ["Metaboli…	0.00148151	0.000379853	2.49546e-06	0.000875657	3.90021	***
[["Metabolism", "Carbohydrate Metabolism", "Inositol phosphate metabolism"], ["Metabolism", "Biosynthesis of Other Secondary Metabolites", "Streptomycin biosynthesis"], ["Environmental Information Processing", "Signal Transduction", "Phosphatidylinositol signaling system"]];Other;Other	0.000797638	0.000416572	1.58217e-05	0.00236427	1.91477	***
[["Metabolism", "Carbohydrate Metabolism", "Pentose phosphate pathway"], ["Metabolism", "Carbohydrate Metabolism", "Glycolysis / Gluconeogenesis"], ["Metabolism", "Carbohydrate Metabolism", "Fructose and mannose metabolism"], ["Metabolism", "Energy Metabolism", "Methane metabolism"], ["Metabolism", "Carbohydrate Metabolism", "Galactose metabolism"]];Other;Other	0.00182981	0.0013439	4.53103e-05	0.00359019	1.36156	***
[["Metabolism", "Carbohydrate Metabolism", "Pentose phosphate pathway"], ["Metabolism", "Carbohydrate Metabolism", "Pentose and glucuronate interconversions"]];Other;Other	0.000895135	0.000559872	0.00196082	0.0084063	1.59882	**
[["Metabolism", "Carbohydrate Metabolism", "Pentose phosphate pathway"], ["Metabolism", "Carbohydrate Metabolism", "Starch and sucrose metabolism"], ["Metabolism", "Carbohydrate Metabolism", "Glycolysis / Gluconeogenesis"], ["Metabolism", "Carbohydrate Metabolism", "Amino sugar and nucleotide sugar metabolism"]];Other;Other	0.000915968	0.000760884	0.00059024	0.00621716	1.20382	***
[["Metabolism", "Carbohydrate Metabolism", "Propanoate metabolism"], ["Metabolism", "Carbohydrate Metabolism", "Glyoxylate and dicarboxylate metabolism"], ["Metabolism", "Energy Metabolism", "Carbon fixation pathways in prokaryotes"], ["Metabolism", "Amino Acid Metabolism", "Valine, leucine and isoleucine degradation"]];Other;Other	0.00149528	0.000439065	3.25975e-06	0.00113835	3.4056	***
[["Metabolism", "Carbohydrate Metabolism", "Starch and sucrose metabolism"], ["Metabolism", "Carbohydrate Metabolism", "Galactose metabolism"]];Other;Other	0.00239249	0.00142888	0.00105486	0.00709282	1.67438	**
[["Metabolism", "Energy Metabolism", "Carbon fixation in photosynthetic organisms"], ["Metabolism", "Carbohydrate Metabolism", "Pyruvate metabolism"]];Other;Other	0.000924781	0.000648975	9.69805e-05	0.00429072	1.42499	***
[["Metabolism", "Energy Metabolism", "Carbon fixation pathways in prokaryotes"]];Other;Other	0.000848405	0.000581873	0.00104062	0.00674256	1.45806	**
[["Metabolism", "Energy Metabolism", "Methane metabolism"]];Other;Other	0.00321641	0.00217972	0.00241059	0.00761821	1.47561	**
[["Metabolism", "Energy Metabolism", "Oxidative phosphorylation"], ["Genetic Information Processing", "Folding, Sorting and Degradation", "RNA degradation"]];Other;Other	0.000895769	0.000657327	2.40918e-06	0.000788091	1.36274	***
[["Metabolism", "Energy Metabolism", "Oxidative phosphorylation"], ["Metabolism", "Energy Metabolism", "Methane metabolism"]];Other;Other	0.00523589	0.00326173	0.00193907	0.00709282	1.60525	**
[["Metabolism", "Energy Metabolism", "Oxidative phosphorylation"]];Other;Other	0.0118751	0.00668572	0.000105087	0.00402802	1.7762	***
[["Metabolism", "Enzyme Families", "Peptidases"], ["Cellular Processes", "Cell Growth and Death", "Cell cycle - Caulobacter"]];Other;Other	0.00277998	0.00227094	9.65296e-05	0.00385289	1.22415	***
[["Metabolism", "Enzyme Families", "Peptidases"], ["Environmental Information Processing", "Signaling Molecules and Interaction", "Cellular antigens"], ["Organismal Systems", "Digestive System", "Protein digestion and absorption"]];Other;Other	0.000737789	0.000145346	4.73067e-05	0.00323993	5.07608	***
[["Metabolism", "Enzyme Families", "Peptidases"], ["Genetic Information Processing", "Folding, Sorting and Degradation", "Protein export"]];Other;Other	0.00273693	0.00217989	0.000372657	0.00481611	1.25553	***
[["Metabolism", "Enzyme Families", "Peptidases"], ["Human Diseases", "Infectious Diseases", "Epithelial cell signaling in Helicobacter pylori infection"]];Other;Other	0.00173167	0.00100435	2.6588e-06	0.000788091	1.72417	***
[["Metabolism", "Enzyme Families", "Peptidases"], ["Metabolism", "Amino Acid Metabolism", "Alanine, aspartate and glutamate metabolism"], ["Metabolism", "Nucleotide Metabolism", "Purine metabolism"]];Other;Other	0.00167318	0.000860812	2.49051e-05	0.0025394	1.94372	***
[["Metabolism", "Enzyme Families", "Peptidases"]];Other;Other	0.0182115	0.0137873	0.000125284	0.0033275	1.32089	***
[["Metabolism", "Glycan Biosynthesis and Metabolism", "Glycosphingolipid biosynthesis - globo series"], ["Metabolism", "Lipid Metabolism", "Glycerolipid metabolism"], ["Metabolism", "Lipid Metabolism", "Sphingolipid metabolism"], ["Metabolism", "Carbohydrate Metabolism", "Galactose metabolism"]];Other;Other	0.00174579	0.00104086	0.000137732	0.00323993	1.67726	***
[["Metabolism", "Glycan Biosynthesis and Metabolism", "Glycosyltransferases"], ["Metabolism", "Carbohydrate Metabolism", "Starch and sucrose metabolism"]];Other;Other	0.00091755	0.000533291	0.000305792	0.00367776	1.72054	***
[["Metabolism", "Glycan Biosynthesis and Metabolism", "Glycosyltransferases"], ["Metabolism", "Glycan Biosynthesis and Metabolism", "Lipopolysaccharide biosynthesis proteins"], ["Metabolism", "Glycan Biosynthesis and Metabolism", "Lipopolysaccharide biosynthesis"]];Other;Other	0.00170835	0.00080252	0.00150723	0.00542907	2.12873	**
[["Metabolism", "Glycan Biosynthesis and Metabolism", "Glycosyltransferases"], ["Metabolism", "Glycan Biosynthesis and Metabolism", "N-Glycan biosynthesis"]];Other;Other	0.00084301	0.000324906	0.000222713	0.00350263	2.59463	***
[["Metabolism", "Glycan Biosynthesis and Metabolism", "Lipopolysaccharide biosynthesis proteins"], ["Metabolism", "Glycan Biosynthesis and Metabolism", "Lipopolysaccharide biosynthesis"]];Other;Other	0.00740259	0.00276856	2.34837e-05	0.00218914	2.67381	***
[["Metabolism", "Glycan Biosynthesis and Metabolism", "Other glycan degradation"], ["Metabolism", "Glycan Biosynthesis and Metabolism", "Glycosphingolipid biosynthesis - globo series"], ["Metabolism", "Glycan Biosynthesis and Metabolism", "Glycosaminoglycan degradation"], ["Metabolism", "Carbohydrate Metabolism", "Amino sugar and nucleotide sugar metabolism"], ["Cellular Processes", "Transport an…	0.00373562	0.000765632	8.15491e-07	0.000350263	4.87914	***
[["Metabolism", "Glycan Biosynthesis and Metabolism", "Other glycan degradation"], ["Metabolism", "Lipid Metabolism", "Sphingolipid metabolism"], ["Metabolism", "Carbohydrate Metabolism", "Galactose metabolism"]];Other;Other	0.00387652	0.00163431	1.41177e-05	0.00183888	2.37196	***
[["Metabolism", "Glycan Biosynthesis and Metabolism", "Other glycan degradation"]];Other;Other	0.00264749	0.00148611	3.48602e-05	0.00236427	1.78149	***
[["Metabolism", "Lipid Metabolism", "Fatty acid biosynthesis"], ["Metabolism", "Lipid Metabolism", "Lipid biosynthesis proteins"]];Other;Other	0.00461331	0.00395799	0.000665027	0.00385289	1.16557	***
[["Metabolism", "Lipid Metabolism", "Glycerophospholipid metabolism"], ["Metabolism", "Amino Acid Metabolism", "Glycine, serine and threonine metabolism"]];Other;Other	0.000861011	0.000422272	0.000261051	0.0030648	2.039	***
[["Metabolism", "Metabolism of Cofactors and Vitamins", "Biotin metabolism"], ["Genetic Information Processing", "Transcription", "Transcription factors"]];Other;Other	0.000908127	0.000738985	9.5762e-05	0.00271454	1.22888	***
[["Metabolism", "Metabolism of Cofactors and Vitamins", "Biotin metabolism"], ["Metabolism", "Amino Acid Metabolism", "Amino acid related enzymes"]];Other;Other	0.00154259	0.000439008	2.90677e-06	0.000788091	3.51382	***
[["Metabolism", "Metabolism of Cofactors and Vitamins", "Biotin metabolism"]];Other;Other	0.00168697	0.000970432	3.50398e-06	0.000788091	1.73836	***
[["Metabolism", "Metabolism of Cofactors and Vitamins", "Folate biosynthesis"]];Other;Other	0.00743834	0.00385083	3.89093e-07	0.000175131	1.93162	***
[["Metabolism", "Metabolism of Cofactors and Vitamins", "Lipoic acid metabolism"]];Other;Other	0.00162839	0.000749106	6.03674e-06	0.00113835	2.17378	***
[["Metabolism", "Metabolism of Cofactors and Vitamins", "Nicotinate and nicotinamide metabolism"], ["Cellular Processes", "Transport and Catabolism", "Peroxisome"]];Other;Other	0.000755166	0.000279279	2.94745e-05	0.00166375	2.70398	***
[["Metabolism", "Metabolism of Cofactors and Vitamins", "Nicotinate and nicotinamide metabolism"], ["Metabolism", "Amino Acid Metabolism", "Alanine, aspartate and glutamate metabolism"]];Other;Other	0.000891851	0.00043111	1.44105e-06	0.000437828	2.06873	***
[["Metabolism", "Metabolism of Cofactors and Vitamins", "Nicotinate and nicotinamide metabolism"]];Other;Other	0.00443863	0.00341173	0.00098705	0.00350263	1.30099	***
[["Metabolism", "Metabolism of Cofactors and Vitamins", "One carbon pool by folate"], ["Metabolism", "Amino Acid Metabolism", "Glycine, serine and threonine metabolism"], ["Metabolism", "Energy Metabolism", "Nitrogen metabolism"]];Other;Other	0.000785899	0.000293243	8.80112e-06	0.00113835	2.68003	***
[["Metabolism", "Metabolism of Cofactors and Vitamins", "One carbon pool by folate"], ["Metabolism", "Amino Acid Metabolism", "Histidine metabolism"]];Other;Other	0.000724151	0.000131968	5.12888e-05	0.00175131	5.48732	***
[["Metabolism", "Metabolism of Cofactors and Vitamins", "One carbon pool by folate"], ["Metabolism", "Energy Metabolism", "Carbon fixation pathways in prokaryotes"], ["Metabolism", "Energy Metabolism", "Methane metabolism"]];Other;Other	0.000890499	0.00056866	0.00298951	0.00394046	1.56596	**
[["Metabolism", "Metabolism of Cofactors and Vitamins", "One carbon pool by folate"], ["Metabolism", "Metabolism of Cofactors and Vitamins", "Folate biosynthesis"]];Other;Other	0.000884159	0.000652841	0.00351728	0.00394046	1.35432	**
[["Metabolism", "Metabolism of Cofactors and Vitamins", "One carbon pool by folate"], ["Metabolism", "Nucleotide Metabolism", "Purine metabolism"]];Other;Other	0.00400329	0.00214701	0.000199174	0.00210158	1.86458	***
[["Metabolism", "Metabolism of Cofactors and Vitamins", "One carbon pool by folate"], ["Metabolism", "Nucleotide Metabolism", "Pyrimidine metabolism"]];Other;Other	0.000914971	0.00075515	0.000642856	0.00271454	1.21164	***
[["Metabolism", "Metabolism of Cofactors and Vitamins", "Pantothenate and CoA biosynthesis"]];Other;Other	0.00616044	0.00493455	0.000200335	0.00201401	1.24843	***
[["Metabolism", "Metabolism of Cofactors and Vitamins", "Riboflavin metabolism"]];Other;Other	0.00436914	0.00309224	6.52716e-05	0.00157618	1.41293	***
[["Metabolism", "Metabolism of Cofactors and Vitamins", "Thiamine metabolism"], ["Metabolism", "Metabolism of Other Amino Acids", "Selenocompound metabolism"]];Other;Other	0.00167211	0.000910778	1.32705e-05	0.000875657	1.83592	***
[["Metabolism", "Metabolism of Cofactors and Vitamins", "Thiamine metabolism"], ["Metabolism", "Nucleotide Metabolism", "Purine metabolism"]];Other;Other	0.0009101	0.000771284	0.000954923	0.0025394	1.17998	***
[["Metabolism", "Metabolism of Cofactors and Vitamins", "Thiamine metabolism"]];Other;Other	0.00607117	0.00453269	2.36369e-05	0.00105079	1.33942	***
[["Metabolism", "Metabolism of Cofactors and Vitamins", "Ubiquinone and other terpenoid-quinone biosynthesis"]];Other;Other	0.00422143	0.00284233	0.00101933	0.0025394	1.4852	**
[["Metabolism", "Metabolism of Cofactors and Vitamins", "Vitamin B6 metabolism"]];Other;Other	0.00263432	0.00169028	5.16044e-07	8.75657e-05	1.55852	***
[["Metabolism", "Metabolism of Other Amino Acids", "Cyanoamino acid metabolism"], ["Metabolism", "Amino Acid Metabolism", "Alanine, aspartate and glutamate metabolism"], ["Metabolism", "Energy Metabolism", "Nitrogen metabolism"]];Other;Other	0.00161327	0.00100124	0.00228516	0.00271454	1.61127	**
[["Metabolism", "Metabolism of Other Amino Acids", "Cyanoamino acid metabolism"], ["Metabolism", "Carbohydrate Metabolism", "Starch and sucrose metabolism"], ["Metabolism", "Biosynthesis of Other Secondary Metabolites", "Phenylpropanoid biosynthesis"]];Other;Other	0.00330604	0.00203119	0.000471217	0.00183888	1.62764	***
[["Metabolism", "Metabolism of Other Amino Acids", "Cyanoamino acid metabolism"], ["Metabolism", "Metabolism of Cofactors and Vitamins", "One carbon pool by folate"], ["Metabolism", "Amino Acid Metabolism", "Glycine, serine and threonine metabolism"], ["Metabolism", "Energy Metabolism", "Methane metabolism"]];Other;Other	0.000906361	0.000726956	0.000308455	0.00148862	1.24679	***
[["Metabolism", "Metabolism of Other Amino Acids", "D-Glutamine and D-glutamate metabolism"]];Other;Other	0.000891537	0.000717762	0.000429777	0.00166375	1.24211	***
[["Metabolism", "Metabolism of Other Amino Acids", "beta-Alanine metabolism"], ["Human Diseases", "Metabolic Diseases", "Type I diabetes mellitus"], ["Metabolism", "Metabolism of Other Amino Acids", "Taurine and hypotaurine metabolism"], ["Metabolism", "Carbohydrate Metabolism", "Butanoate metabolism"], ["Metabolism", "Amino Acid Metabolism", "Alanine, aspartate and glutamate metabolism"]];Other;…	0.00072181	0.000203157	5.86544e-06	0.00061296	3.55296	***
[["Metabolism", "Metabolism of Other Amino Acids", "beta-Alanine metabolism"], ["Metabolism", "Enzyme Families", "Peptidases"], ["Metabolism", "Metabolism of Other Amino Acids", "Glutathione metabolism"], ["Metabolism", "Amino Acid Metabolism", "Histidine metabolism"], ["Metabolism", "Amino Acid Metabolism", "Arginine and proline metabolism"]];Other;Other	0.00146347	0.00051042	1.41121e-05	0.000700525	2.86718	***
[["Metabolism", "Metabolism of Other Amino Acids", "beta-Alanine metabolism"], ["Metabolism", "Metabolism of Cofactors and Vitamins", "Pantothenate and CoA biosynthesis"]];Other;Other	0.00156122	0.000537644	4.97305e-06	0.000525394	2.90382	***
[["Metabolism", "Metabolism of Terpenoids and Polyketides", "Polyketide sugar unit biosynthesis"], ["Metabolism", "Biosynthesis of Other Secondary Metabolites", "Streptomycin biosynthesis"], ["Metabolism", "Metabolism of Terpenoids and Polyketides", "Biosynthesis of vancomycin group antibiotics"]];Other;Other	0.0016981	0.000918552	9.23061e-07	8.75657e-05	1.84867	***
[["Metabolism", "Metabolism of Terpenoids and Polyketides", "Polyketide sugar unit biosynthesis"], ["Metabolism", "Biosynthesis of Other Secondary Metabolites", "Streptomycin biosynthesis"]];Other;Other	0.0033754	0.00180729	1.23753e-06	8.75657e-05	1.86766	***
[["Metabolism", "Metabolism of Terpenoids and Polyketides", "Prenyltransferases"], ["Metabolism", "Metabolism of Cofactors and Vitamins", "Ubiquinone and other terpenoid-quinone biosynthesis"]];Other;Other	0.00160875	0.000961777	0.000828701	0.00113835	1.67269	***
[["Metabolism", "Metabolism of Terpenoids and Polyketides", "Prenyltransferases"], ["Metabolism", "Metabolism of Terpenoids and Polyketides", "Terpenoid backbone biosynthesis"]];Other;Other	0.00444194	0.00353115	0.000331238	0.000963222	1.25793	***
[["Metabolism", "Metabolism of Terpenoids and Polyketides", "Prenyltransferases"], ["Metabolism", "Metabolism of Terpenoids and Polyketides", "Zeatin biosynthesis"]];Other;Other	0.000922314	0.000766582	0.00105484	0.00122592	1.20315	**
[["Metabolism", "Metabolism of Terpenoids and Polyketides", "Terpenoid backbone biosynthesis"]];Other;Other	0.00640573	0.00519021	8.14776e-06	0.000350263	1.2342	***
[["Metabolism", "Nucleotide Metabolism", "Pyrimidine metabolism"], ["Genetic Information Processing", "Folding, Sorting and Degradation", "RNA degradation"], ["Metabolism", "Nucleotide Metabolism", "Purine metabolism"]];Other;Other	0.00090019	0.000620126	2.40554e-06	8.75657e-05	1.45162	***
[["Metabolism", "Nucleotide Metabolism", "Pyrimidine metabolism"], ["Genetic Information Processing", "Replication and Repair", "DNA repair and recombination proteins"], ["Metabolism", "Nucleotide Metabolism", "Purine metabolism"], ["Genetic Information Processing", "Replication and Repair", "Mismatch repair"], ["Genetic Information Processing", "Replication and Repair", "Homologous recombination…	0.00622853	0.00481766	0.000572882	0.000788091	1.29286	***
[["Metabolism", "Nucleotide Metabolism", "Pyrimidine metabolism"], ["Metabolism", "Metabolism of Cofactors and Vitamins", "Nicotinate and nicotinamide metabolism"], ["Metabolism", "Nucleotide Metabolism", "Purine metabolism"]];Other;Other	0.00172254	0.000976678	2.10699e-05	0.000262697	1.76367	***
[["Metabolism", "Nucleotide Metabolism", "Pyrimidine metabolism"], ["Metabolism", "Nucleotide Metabolism", "Purine metabolism"]];Other;Other	0.00251413	0.00176618	3.28465e-05	0.000350263	1.42348	***
[["Metabolism", "Nucleotide Metabolism", "Pyrimidine metabolism"], ["Metabolism", "Xenobiotics Biodegradation and Metabolism", "Drug metabolism - other enzymes"]];Other;Other	0.00320639	0.00182802	8.63861e-05	0.000525394	1.75403	***
[["Metabolism", "Xenobiotics Biodegradation and Metabolism", "Toluene degradation"], ["Metabolism", "Carbohydrate Metabolism", "Citrate cycle (TCA cycle)"], ["Metabolism", "Energy Metabolism", "Carbon fixation pathways in prokaryotes"], ["Metabolism", "Energy Metabolism", "Oxidative phosphorylation"], ["Metabolism", "Carbohydrate Metabolism", "Butanoate metabolism"]];Other;Other	0.00235364	0.000953841	4.49003e-06	0.000175131	2.46754	***
[["Organismal Systems", "Endocrine System", "Adipocytokine signaling pathway"], ["Cellular Processes", "Transport and Catabolism", "Peroxisome"], ["Metabolism", "Lipid Metabolism", "Fatty acid metabolism"], ["Organismal Systems", "Endocrine System", "PPAR signaling pathway"], ["Metabolism", "Lipid Metabolism", "Lipid biosynthesis proteins"]];Other;Other	0.00163812	0.000830661	3.14468e-05	0.000175131	1.97207	***
[["Genetic Information Processing", "Translation", "Ribosome Biogenesis"], ["Metabolism", "Nucleotide Metabolism", "Purine metabolism"]];Other;Other	1.19122e-06	4.82054e-05	0.0300136	0.0317863	0.0247114	*
[["Metabolism", "Amino Acid Metabolism", "Glycine, serine and threonine metabolism"], ["Metabolism", "Amino Acid Metabolism", "Arginine and proline metabolism"]];Other;Other	7.52799e-06	7.05394e-05	0.0297651	0.0316112	0.10672	*
[["Metabolism", "Amino Acid Metabolism", "Lysine biosynthesis"], ["Metabolism", "Enzyme Families", "Peptidases"]];Other;Other	2.68172e-06	8.3821e-05	0.0239437	0.0307356	0.0319934	*
[["Metabolism", "Amino Acid Metabolism", "Valine, leucine and isoleucine degradation"]];Other;Other	3.4312e-05	0.000279738	0.0185236	0.0295972	0.122658	*
[["Metabolism", "Biosynthesis of Other Secondary Metabolites", "Tropane, piperidine and pyridine alkaloid biosynthesis"]];Other;Other	7.53597e-06	7.05835e-05	0.0297645	0.0313485	0.106767	*
[["Metabolism", "Carbohydrate Metabolism", "C5-Branched dibasic acid metabolism"], ["Metabolism", "Carbohydrate Metabolism", "Butanoate metabolism"]];Other;Other	3.39334e-06	0.000111532	0.0158177	0.0290718	0.0304247	*
[["Metabolism", "Carbohydrate Metabolism", "Fructose and mannose metabolism"], ["Metabolism", "Carbohydrate Metabolism", "Pentose and glucuronate interconversions"]];Other;Other	0.000247366	0.000499555	0.0263963	0.0309107	0.495172	*
[["Metabolism", "Carbohydrate Metabolism", "Glycolysis / Gluconeogenesis"], ["Metabolism", "Xenobiotics Biodegradation and Metabolism", "Caprolactam degradation"], ["Metabolism", "Lipid Metabolism", "Glycerolipid metabolism"]];Other;Other	1.73824e-05	0.000101316	0.0192026	0.0297723	0.171566	*
[["Metabolism", "Carbohydrate Metabolism", "Inositol phosphate metabolism"], ["Metabolism", "Metabolism of Cofactors and Vitamins", "Riboflavin metabolism"], ["Metabolism", "Xenobiotics Biodegradation and Metabolism", "Aminobenzoate degradation"]];Other;Other	8.73418e-07	5.63546e-05	0.0176962	0.0294221	0.0154986	*
[["Metabolism", "Carbohydrate Metabolism", "Pentose phosphate pathway"], ["Metabolism", "Energy Metabolism", "Carbon fixation in photosynthetic organisms"], ["Metabolism", "Energy Metabolism", "Methane metabolism"]];Other;Other	5.13147e-05	0.000190007	0.0190572	0.0295096	0.270068	*
[["Metabolism", "Carbohydrate Metabolism", "Pentose phosphate pathway"], ["Metabolism", "Nucleotide Metabolism", "Purine metabolism"], ["Metabolism", "Biosynthesis of Other Secondary Metabolites", "Streptomycin biosynthesis"], ["Metabolism", "Carbohydrate Metabolism", "Starch and sucrose metabolism"], ["Metabolism", "Carbohydrate Metabolism", "Glycolysis / Gluconeogenesis"], ["Metabolism", "Carbo…	2.4665e-05	0.00016912	0.0213866	0.0298599	0.145843	*
[["Metabolism", "Carbohydrate Metabolism", "Pentose phosphate pathway"], ["Metabolism", "Nucleotide Metabolism", "Purine metabolism"]];Other;Other	0.00106337	0.00138584	0.0288911	0.0305604	0.767306	*
[["Metabolism", "Carbohydrate Metabolism", "Propanoate metabolism"], ["Metabolism", "Amino Acid Metabolism", "Amino acid related enzymes"], ["Metabolism", "Carbohydrate Metabolism", "Butanoate metabolism"], ["Metabolism", "Amino Acid Metabolism", "Alanine, aspartate and glutamate metabolism"], ["Metabolism", "Metabolism of Other Amino Acids", "beta-Alanine metabolism"]];Other;Other	6.33736e-06	0.000100218	0.021388	0.0298599	0.0632358	*
[["Metabolism", "Carbohydrate Metabolism", "Propanoate metabolism"], ["Metabolism", "Amino Acid Metabolism", "Cysteine and methionine metabolism"], ["Metabolism", "Carbohydrate Metabolism", "Glycolysis / Gluconeogenesis"], ["Metabolism", "Carbohydrate Metabolism", "Pyruvate metabolism"]];Other;Other	0.000147447	0.000742288	0.0150445	0.0287215	0.198638	*
[["Metabolism", "Energy Metabolism", "Carbon fixation pathways in prokaryotes"], ["Metabolism", "Carbohydrate Metabolism", "Propanoate metabolism"], ["Metabolism", "Carbohydrate Metabolism", "Glycolysis / Gluconeogenesis"], ["Metabolism", "Carbohydrate Metabolism", "Pyruvate metabolism"], ["Metabolism", "Lipid Metabolism", "Lipid biosynthesis proteins"], ["Metabolism", "Energy Metabolism", "Metha…	0.000178037	0.000408322	0.0124961	0.0281961	0.436022	*
[["Metabolism", "Enzyme Families", "Peptidases"], ["Metabolism", "Glycan Biosynthesis and Metabolism", "Peptidoglycan biosynthesis"]];Other;Other	0.00134135	0.00175476	0.021109	0.0293345	0.764409	*
[["Metabolism", "Enzyme Families", "Peptidases"], ["Metabolism", "Nucleotide Metabolism", "Purine metabolism"]];Other;Other	3.50356e-07	6.34492e-05	0.0243246	0.0295972	0.00552183	*
[["Metabolism", "Enzyme Families", "Protein kinases"], ["Environmental Information Processing", "Signal Transduction", "Two-component system"]];Other;Other	0.00332465	0.00421226	0.0120171	0.0278459	0.78928	*
[["Metabolism", "Lipid Metabolism", "Fatty acid biosynthesis"], ["Metabolism", "Lipid Metabolism", "Lipid biosynthesis proteins"], ["Metabolism", "Lipid Metabolism", "Biosynthesis of unsaturated fatty acids"]];Other;Other	0.00134657	0.00190151	0.0131786	0.028021	0.708161	*
[["Metabolism", "Lipid Metabolism", "Glycerolipid metabolism"], ["Metabolism", "Energy Metabolism", "Methane metabolism"], ["Organismal Systems", "Immune System", "RIG-I-like receptor signaling pathway"]];Other;Other	2.68747e-06	6.2916e-05	0.00700631	0.025394	0.0427151	**
[["Metabolism", "Lipid Metabolism", "Glycerophospholipid metabolism"], ["Metabolism", "Lipid Metabolism", "alpha-Linolenic acid metabolism"]];Other;Other	8.68147e-07	2.34016e-06	0.00646622	0.0247811	0.370978	**
[["Metabolism", "Lipid Metabolism", "Lipid biosynthesis proteins"]];Other;Other	0.000163389	0.000453678	0.0108696	0.0269702	0.360142	*
[["Metabolism", "Metabolism of Cofactors and Vitamins", "Nicotinate and nicotinamide metabolism"], ["Metabolism", "Energy Metabolism", "Nitrogen metabolism"]];Other;Other	9.73587e-06	0.000196818	0.0117448	0.0274081	0.0494664	*
[["Metabolism", "Metabolism of Cofactors and Vitamins", "Nicotinate and nicotinamide metabolism"], ["Metabolism", "Nucleotide Metabolism", "Purine metabolism"]];Other;Other	5.35937e-05	0.000300257	0.0152316	0.0279335	0.178492	*
[["Metabolism", "Metabolism of Other Amino Acids", "D-Alanine metabolism"], ["Human Diseases", "Infectious Diseases", "Staphylococcus aureus infection"]];Other;Other	5.66465e-06	0.000337617	0.0252291	0.0287215	0.0167784	*
[["Metabolism", "Metabolism of Other Amino Acids", "D-Arginine and D-ornithine metabolism"], ["Metabolism", "Metabolism of Other Amino Acids", "D-Alanine metabolism"], ["Metabolism", "Amino Acid Metabolism", "Phenylalanine metabolism"], ["Metabolism", "Amino Acid Metabolism", "Arginine and proline metabolism"], ["Metabolism", "Amino Acid Metabolism", "Amino acid related enzymes"], ["Metabolism", …	1.77715e-05	9.954e-05	0.00374104	0.0227671	0.178537	**
[["Metabolism", "Metabolism of Other Amino Acids", "Glutathione metabolism"]];Other;Other	6.62726e-05	0.000347543	0.0104929	0.0265324	0.190689	*
[["Metabolism", "Metabolism of Other Amino Acids", "Phosphonate and phosphinate metabolism"], ["Metabolism", "Lipid Metabolism", "Glycerophospholipid metabolism"]];Other;Other	1.9425e-05	5.6851e-05	0.0109204	0.02662	0.341683	*
[["Metabolism", "Metabolism of Other Amino Acids", "Taurine and hypotaurine metabolism"], ["Metabolism", "Amino Acid Metabolism", "Alanine, aspartate and glutamate metabolism"]];Other;Other	8.51063e-05	0.000226671	0.0110192	0.0267075	0.375461	*
[["Metabolism", "Metabolism of Terpenoids and Polyketides", "Limonene and pinene degradation"], ["Metabolism", "Xenobiotics Biodegradation and Metabolism", "Caprolactam degradation"], ["Metabolism", "Carbohydrate Metabolism", "Butanoate metabolism"], ["Metabolism", "Xenobiotics Biodegradation and Metabolism", "Benzoate degradation"], ["Metabolism", "Lipid Metabolism", "Fatty acid metabolism"], ["…	5.58422e-05	0.000389096	0.0225215	0.0278459	0.143518	*
[["Metabolism", "Nucleotide Metabolism", "Purine metabolism"], ["Human Diseases", "Immune System Diseases", "Primary immunodeficiency"]];Other;Other	4.34533e-06	0.000121386	0.00296625	0.0216287	0.0357976	**
[["Metabolism", "Nucleotide Metabolism", "Purine metabolism"]];Other;Other	0.0100457	0.0113121	0.0276245	0.0279335	0.888057	*
[["Metabolism", "Nucleotide Metabolism", "Pyrimidine metabolism"], ["Metabolism", "Amino Acid Metabolism", "Arginine and proline metabolism"]];Other;Other	2.05683e-05	0.000127919	0.00480917	0.0234676	0.160792	**
[["Metabolism", "Xenobiotics Biodegradation and Metabolism", "Aminobenzoate degradation"]];Other;Other	2.18278e-05	0.000230052	0.00656475	0.0243433	0.094882	**
[["Metabolism", "Xenobiotics Biodegradation and Metabolism", "Bisphenol degradation"], ["Metabolism", "Xenobiotics Biodegradation and Metabolism", "Aminobenzoate degradation"], ["Metabolism", "Biosynthesis of Other Secondary Metabolites", "Tropane, piperidine and pyridine alkaloid biosynthesis"]];Other;Other	6.2324e-05	0.000172641	0.01626	0.0267951	0.361003	*
[["Metabolism", "Xenobiotics Biodegradation and Metabolism", "Chloroalkane and chloroalkene degradation"], ["Metabolism", "Energy Metabolism", "Nitrogen metabolism"]];Other;Other	9.04829e-05	0.000281155	0.00403545	0.0225919	0.321825	**
[["Metabolism", "Xenobiotics Biodegradation and Metabolism", "Chloroalkane and chloroalkene degradation"], ["Metabolism", "Xenobiotics Biodegradation and Metabolism", "Chlorocyclohexane and chlorobenzene degradation"]];Other;Other	2.6075e-05	0.000178598	0.00124133	0.0177758	0.145998	**
[["Metabolism", "Xenobiotics Biodegradation and Metabolism", "Dioxin degradation"], ["Metabolism", "Carbohydrate Metabolism", "Butanoate metabolism"], ["Metabolism", "Lipid Metabolism", "Fatty acid metabolism"], ["Metabolism", "Xenobiotics Biodegradation and Metabolism", "Naphthalene degradation"], ["Metabolism", "Xenobiotics Biodegradation and Metabolism", "Benzoate degradation"], ["Metabolism",…	0.000182424	0.000676437	0.00171154	0.0190018	0.269683	**
[["Metabolism", "Xenobiotics Biodegradation and Metabolism", "Dioxin degradation"], ["Metabolism", "Xenobiotics Biodegradation and Metabolism", "Benzoate degradation"]];Other;Other	1.3426e-05	0.000266552	0.00513471	0.0232049	0.0503693	**
[["Metabolism", "Xenobiotics Biodegradation and Metabolism", "Drug metabolism - other enzymes"]];Other;Other	0.000124603	0.000311161	0.0158582	0.0262697	0.400446	*
[["Metabolism", "Xenobiotics Biodegradation and Metabolism", "Ethylbenzene degradation"], ["Metabolism", "Metabolism of Terpenoids and Polyketides", "Geraniol degradation"], ["Metabolism", "Lipid Metabolism", "Fatty acid metabolism"], ["Metabolism", "Lipid Metabolism", "alpha-Linolenic acid metabolism"], ["Metabolism", "Xenobiotics Biodegradation and Metabolism", "Benzoate degradation"], ["Metabo…	1.58658e-05	0.000125418	0.0253711	0.0267951	0.126503	*
[["Metabolism", "Xenobiotics Biodegradation and Metabolism", "Nitrotoluene degradation"], ["Metabolism", "Energy Metabolism", "Methane metabolism"]];Other;Other	7.08644e-05	0.000393129	0.00532879	0.02338	0.180257	**
[["Organismal Systems", "Digestive System", "Mineral absorption"]];Other;Other	2.07501e-05	0.00013262	0.000486361	0.0143608	0.156462	***
[["Organismal Systems", "Endocrine System", "Insulin signaling pathway"]];Other;Other	6.7472e-05	0.00020847	0.00741968	0.0243433	0.323653	**
[["Cellular Processes", "Cell Motility", "Bacterial motility proteins"], ["Cellular Processes", "Cell Motility", "Bacterial chemotaxis"], ["Environmental Information Processing", "Signal Transduction", "Two-component system"]];Other;Other	0.0010376	0.0043916	0.00059534	0.0147986	0.236268	***
[["Cellular Processes", "Cell Motility", "Bacterial motility proteins"], ["Cellular Processes", "Cell Motility", "Bacterial chemotaxis"]];Other;Other	0.000119245	0.000561001	0.000143143	0.0104203	0.212557	***
[["Cellular Processes", "Cell Motility", "Bacterial motility proteins"], ["Cellular Processes", "Cell Motility", "Flagellar assembly"], ["Organismal Systems", "Environmental Adaptation", "Plant-pathogen interaction"], ["Environmental Information Processing", "Signal Transduction", "Two-component system"]];Other;Other	0.000107533	0.000480086	0.000103715	0.00936953	0.223988	***
[["Cellular Processes", "Cell Motility", "Bacterial motility proteins"], ["Cellular Processes", "Cell Motility", "Flagellar assembly"]];Other;Other	0.000685294	0.003173	0.000171682	0.010683	0.215977	***
[["Cellular Processes", "Cell Motility", "Bacterial motility proteins"], ["Genetic Information Processing", "Transcription", "Transcription machinery"], ["Human Diseases", "Infectious Diseases", "Vibrio cholerae pathogenic cycle"], ["Environmental Information Processing", "Signal Transduction", "Two-component system"]];Other;Other	5.99418e-05	0.000254476	0.000241138	0.0114711	0.23555	***
[["Cellular Processes", "Cell Motility", "Bacterial motility proteins"]];Other;Other	0.000128254	0.000784945	0.00248694	0.0198774	0.163392	**
[["Cellular Processes", "Cell Motility", "Flagellar assembly"], ["Cellular Processes", "Cell Motility", "Bacterial motility proteins"], ["Cellular Processes", "Cell Motility", "Bacterial chemotaxis"], ["Environmental Information Processing", "Signal Transduction", "Two-component system"]];Other;Other	6.26845e-05	0.000294583	0.000105058	0.00936953	0.212791	***
[["Cellular Processes", "Cell Motility", "Flagellar assembly"]];Other;Other	2.28255e-05	0.000115976	0.0236598	0.025394	0.196813	*
[["Cellular Processes", "Transport and Catabolism", "Lysosome"], ["Metabolism", "Lipid Metabolism", "Sphingolipid metabolism"]];Other;Other	2.16281e-05	7.23845e-05	0.00370372	0.0211909	0.298795	**
[["Environmental Information Processing", "Membrane Transport", "ABC transporters"], ["Cellular Processes", "Cell Motility", "Bacterial chemotaxis"], ["Environmental Information Processing", "Membrane Transport", "Transporters"]];Other;Other	0.000236319	0.00135822	0.0018001	0.0181261	0.173992	**
[["Environmental Information Processing", "Membrane Transport", "ABC transporters"], ["Environmental Information Processing", "Membrane Transport", "Transporters"], ["Environmental Information Processing", "Signal Transduction", "Two-component system"]];Other;Other	1.79702e-05	0.00027583	0.00272595	0.0198774	0.0651497	**
[["Environmental Information Processing", "Membrane Transport", "ABC transporters"], ["Environmental Information Processing", "Membrane Transport", "Transporters"]];Other;Other	0.0259257	0.0537412	2.42772e-07	0.000437828	0.482417	***
[["Environmental Information Processing", "Membrane Transport", "ABC transporters"]];Other;Other	3.46103e-06	0.000185914	0.01619	0.0243433	0.0186163	*
[["Environmental Information Processing", "Membrane Transport", "Phosphotransferase system (PTS)"], ["Environmental Information Processing", "Membrane Transport", "Transporters"], ["Metabolism", "Carbohydrate Metabolism", "Ascorbate and aldarate metabolism"]];Other;Other	6.04728e-05	0.000512314	0.00114084	0.0164623	0.118039	**
[["Environmental Information Processing", "Membrane Transport", "Phosphotransferase system (PTS)"], ["Environmental Information Processing", "Membrane Transport", "Transporters"], ["Metabolism", "Carbohydrate Metabolism", "Fructose and mannose metabolism"]];Other;Other	0.000132712	0.000589602	5.30614e-07	0.000700525	0.225087	***
[["Environmental Information Processing", "Membrane Transport", "Phosphotransferase system (PTS)"], ["Environmental Information Processing", "Membrane Transport", "Transporters"]];Other;Other	0.000374982	0.00257857	0.000692228	0.0145359	0.145422	***
[["Environmental Information Processing", "Membrane Transport", "Phosphotransferase system (PTS)"], ["Metabolism", "Carbohydrate Metabolism", "Glycolysis / Gluconeogenesis"], ["Environmental Information Processing", "Membrane Transport", "Transporters"]];Other;Other	8.92497e-07	1.08491e-05	0.00192295	0.0177758	0.0822643	**
[["Environmental Information Processing", "Membrane Transport", "Phosphotransferase system (PTS)"], ["Metabolism", "Carbohydrate Metabolism", "Starch and sucrose metabolism"], ["Environmental Information Processing", "Membrane Transport", "Transporters"]];Other;Other	2.77003e-05	0.000338431	0.004796	0.0211033	0.0818491	**
[["Environmental Information Processing", "Membrane Transport", "Phosphotransferase system (PTS)"], ["Metabolism", "Carbohydrate Metabolism", "Starch and sucrose metabolism"], ["Metabolism", "Carbohydrate Metabolism", "Glycolysis / Gluconeogenesis"], ["Environmental Information Processing", "Membrane Transport", "Transporters"]];Other;Other	1.55792e-06	1.70985e-05	7.42826e-09	8.75657e-05	0.0911144	***
[["Environmental Information Processing", "Membrane Transport", "Secretion system"], ["Cellular Processes", "Cell Motility", "Bacterial motility proteins"], ["Cellular Processes", "Cell Growth and Death", "Cell cycle - Caulobacter"]];Other;Other	9.87492e-06	2.25537e-05	0.00753742	0.0223292	0.437841	**
[["Environmental Information Processing", "Membrane Transport", "Secretion system"], ["Cellular Processes", "Cell Motility", "Bacterial motility proteins"], ["Cellular Processes", "Cell Motility", "Bacterial chemotaxis"], ["Cellular Processes", "Cell Motility", "Flagellar assembly"]];Other;Other	4.50419e-05	0.000214353	0.000140924	0.00980736	0.210129	***
[["Environmental Information Processing", "Membrane Transport", "Secretion system"], ["Cellular Processes", "Cell Motility", "Bacterial motility proteins"], ["Cellular Processes", "Cell Motility", "Flagellar assembly"]];Other;Other	0.000469863	0.00200939	0.000233237	0.010683	0.233834	***
[["Environmental Information Processing", "Membrane Transport", "Secretion system"], ["Cellular Processes", "Cell Motility", "Bacterial motility proteins"]];Other;Other	0.00107474	0.0028007	0.0062749	0.0214536	0.38374	**
[["Environmental Information Processing", "Membrane Transport", "Secretion system"], ["Genetic Information Processing", "Transcription", "Transcription factors"], ["Environmental Information Processing", "Signal Transduction", "Two-component system"]];Other;Other	8.64331e-07	3.00673e-05	0.0114825	0.0227671	0.0287466	*
[["Environmental Information Processing", "Membrane Transport", "Secretion system"], ["Metabolism", "Enzyme Families", "Peptidases"], ["Cellular Processes", "Cell Motility", "Bacterial motility proteins"]];Other;Other	0.000327461	0.000985949	0.00056708	0.01331	0.332128	***
[["Environmental Information Processing", "Membrane Transport", "Secretion system"]];Other;Other	0.00116707	0.00399681	0.0042022	0.0200525	0.291999	**
[["Environmental Information Processing", "Membrane Transport", "Transporters"]];Other;Other	0.0323788	0.050348	0.000167902	0.00989492	0.643099	***
[["Environmental Information Processing", "Signal Transduction", "Phosphatidylinositol signaling system"], ["Metabolism", "Lipid Metabolism", "Glycerophospholipid metabolism"], ["Metabolism", "Lipid Metabolism", "Glycerolipid metabolism"]];Other;Other	0.000139934	0.000389627	0.00109916	0.015324	0.359148	**
[["Environmental Information Processing", "Signal Transduction", "Two-component system"]];Other;Other	0.00706731	0.0101719	0.00439519	0.0197898	0.694788	**
[["Environmental Information Processing", "Signaling Molecules and Interaction", "Bacterial toxins"]];Other;Other	0.00123295	0.00176662	0.000918344	0.0144483	0.697914	***
[["Environmental Information Processing", "Signaling Molecules and Interaction", "Ion channels"]];Other;Other	0.00011544	0.000447802	0.0011727	0.0152364	0.257791	**
[["Genetic Information Processing", "Folding, Sorting and Degradation", "Chaperones and folding catalysts"], ["Genetic Information Processing", "Replication and Repair", "Chromosome"]];Other;Other	7.6747e-05	0.000186903	0.0141484	0.021979	0.410624	*
[["Genetic Information Processing", "Folding, Sorting and Degradation", "Sulfur relay system"], ["Metabolism", "Metabolism of Cofactors and Vitamins", "Folate biosynthesis"]];Other;Other	0.000257772	0.00087743	0.00281901	0.0176883	0.293781	**
[["Genetic Information Processing", "Replication and Repair", "Chromosome"], ["Cellular Processes", "Cell Motility", "Cytoskeleton proteins"]];Other;Other	0.00241295	0.00334684	0.00162808	0.0154116	0.720962	**
[["Genetic Information Processing", "Replication and Repair", "Chromosome"], ["Genetic Information Processing", "Folding, Sorting and Degradation", "RNA degradation"]];Other;Other	5.83119e-05	0.000179625	0.00456973	0.0184764	0.324631	**
[["Genetic Information Processing", "Replication and Repair", "DNA repair and recombination proteins"]];Other;Other	0.00484992	0.00678002	1.26275e-05	0.00429072	0.715326	***
[["Genetic Information Processing", "Replication and Repair", "Mismatch repair"], ["Genetic Information Processing", "Replication and Repair", "DNA repair and recombination proteins"], ["Genetic Information Processing", "Replication and Repair", "DNA replication proteins"]];Other;Other	0.000174862	0.000423604	0.0192768	0.0203152	0.412796	*
[["Genetic Information Processing", "Replication and Repair", "Mismatch repair"], ["Genetic Information Processing", "Replication and Repair", "Nucleotide excision repair"], ["Genetic Information Processing", "Replication and Repair", "DNA repair and recombination proteins"]];Other;Other	0.00112814	0.00157931	2.07372e-06	0.00166375	0.714326	***
[["Genetic Information Processing", "Transcription", "Transcription factors"], ["Environmental Information Processing", "Signal Transduction", "Two-component system"]];Other;Other	1.42706e-05	6.05061e-05	0.00220559	0.015324	0.235854	**
[["Genetic Information Processing", "Transcription", "Transcription factors"], ["Genetic Information Processing", "Replication and Repair", "Chromosome"]];Other;Other	3.86268e-05	0.000235763	7.29641e-07	0.000700525	0.163837	***
[["Genetic Information Processing", "Transcription", "Transcription factors"], ["Genetic Information Processing", "Translation", "Ribosome Biogenesis"], ["Genetic Information Processing", "Transcription", "Transcription machinery"]];Other;Other	1.2798e-05	9.27064e-05	0.000421302	0.0107706	0.138048	***
[["Genetic Information Processing", "Transcription", "Transcription factors"], ["Metabolism", "Nucleotide Metabolism", "Pyrimidine metabolism"]];Other;Other	7.80181e-05	0.000430269	0.000438502	0.0109457	0.181324	***
[["Genetic Information Processing", "Transcription", "Transcription factors"]];Other;Other	0.011189	0.0250446	1.23379e-06	0.00113835	0.446763	***
[["Genetic Information Processing", "Translation", "Aminoacyl-tRNA biosynthesis"], ["Metabolism", "Metabolism of Other Amino Acids", "Selenocompound metabolism"]];Other;Other	8.25362e-06	9.70393e-05	0.00314104	0.0155867	0.0850544	**
[["Genetic Information Processing", "Translation", "Aminoacyl-tRNA biosynthesis"]];Other;Other	0.000940675	0.00323607	3.26406e-06	0.00227671	0.290685	***
[["Genetic Information Processing", "Translation", "RNA transport"]];Other;Other	0.00124349	0.00222791	6.73353e-05	0.00665499	0.558143	***
[["Human Diseases", "Cancers", "Pathways in cancer"], ["Metabolism", "Carbohydrate Metabolism", "Citrate cycle (TCA cycle)"], ["Metabolism", "Energy Metabolism", "Carbon fixation pathways in prokaryotes"], ["Human Diseases", "Cancers", "Renal cell carcinoma"]];Other;Other	6.97834e-05	0.000219384	0.00763609	0.016725	0.318088	**
[["Human Diseases", "Infectious Diseases", "Amoebiasis"]];Other;Other	9.36052e-05	0.000238014	0.0108428	0.017338	0.393276	*
[["Human Diseases", "Infectious Diseases", "Staphylococcus aureus infection"], ["Environmental Information Processing", "Signaling Molecules and Interaction", "Bacterial toxins"]];Other;Other	7.20406e-07	4.00687e-05	0.00689563	0.0165499	0.0179793	**
[["Human Diseases", "Neurodegenerative Diseases", "Prion diseases"], ["Human Diseases", "Neurodegenerative Diseases", "Huntington's disease"], ["Cellular Processes", "Transport and Catabolism", "Peroxisome"], ["Human Diseases", "Neurodegenerative Diseases", "Amyotrophic lateral sclerosis (ALS)"]];Other;Other	2.32896e-05	0.000174303	0.00222877	0.0139229	0.133616	**
[["Metabolism", "Amino Acid Metabolism", "Alanine, aspartate and glutamate metabolism"]];Other;Other	1.12235e-05	0.000282357	0.00361298	0.0150613	0.0397492	**
[["Metabolism", "Amino Acid Metabolism", "Amino acid related enzymes"], ["Metabolism", "Amino Acid Metabolism", "Valine, leucine and isoleucine biosynthesis"], ["Metabolism", "Amino Acid Metabolism", "Alanine, aspartate and glutamate metabolism"]];Other;Other	1.16211e-05	0.000149247	0.0120532	0.0166375	0.0778646	*
[["Metabolism", "Amino Acid Metabolism", "Amino acid related enzymes"], ["Metabolism", "Metabolism of Cofactors and Vitamins", "Folate biosynthesis"]];Other;Other	6.54457e-07	5.88633e-05	0.00901886	0.0161121	0.0111182	**
[["Metabolism", "Amino Acid Metabolism", "Amino acid related enzymes"], ["Metabolism", "Metabolism of Cofactors and Vitamins", "Porphyrin and chlorophyll metabolism"]];Other;Other	0.000103221	0.000457841	0.000251474	0.00831874	0.225453	***
[["Metabolism", "Amino Acid Metabolism", "Amino acid related enzymes"], ["Metabolism", "Metabolism of Other Amino Acids", "Taurine and hypotaurine metabolism"]];Other;Other	1.93007e-06	3.22331e-05	0.0102662	0.0161996	0.0598786	*
[["Metabolism", "Amino Acid Metabolism", "Amino acid related enzymes"]];Other;Other	0.000313036	0.000751561	0.00929504	0.0160245	0.416515	**
[["Metabolism", "Amino Acid Metabolism", "Arginine and proline metabolism"], ["Metabolism", "Nucleotide Metabolism", "Purine metabolism"], ["Metabolism", "Energy Metabolism", "Nitrogen metabolism"]];Other;Other	4.70807e-05	0.000536902	0.000419899	0.00928196	0.0876896	***
[["Metabolism", "Amino Acid Metabolism", "Cysteine and methionine metabolism"], ["Human Diseases", "Infectious Diseases", "Vibrio cholerae pathogenic cycle"]];Other;Other	8.59395e-05	0.000345549	0.00131499	0.0118214	0.248704	**
[["Metabolism", "Amino Acid Metabolism", "Cysteine and methionine metabolism"], ["Metabolism", "Energy Metabolism", "Sulfur metabolism"], ["Metabolism", "Metabolism of Other Amino Acids", "Selenocompound metabolism"], ["Metabolism", "Energy Metabolism", "Nitrogen metabolism"]];Other;Other	8.92577e-06	0.000135014	0.0115842	0.0156743	0.0661099	*
[["Metabolism", "Amino Acid Metabolism", "Cysteine and methionine metabolism"], ["Metabolism", "Metabolism of Other Amino Acids", "Selenocompound metabolism"]];Other;Other	6.94901e-05	0.000237367	0.00619866	0.0148862	0.292754	**
[["Metabolism", "Amino Acid Metabolism", "Glycine, serine and threonine metabolism"], ["Metabolism", "Amino Acid Metabolism", "Valine, leucine and isoleucine biosynthesis"]];Other;Other	0.000137269	0.000419528	0.000132563	0.00718039	0.327198	***
[["Metabolism", "Amino Acid Metabolism", "Glycine, serine and threonine metabolism"], ["Metabolism", "Energy Metabolism", "Methane metabolism"]];Other;Other	0.00112453	0.00136393	0.00523136	0.0143608	0.824474	**
[["Metabolism", "Amino Acid Metabolism", "Histidine metabolism"], ["Metabolism", "Energy Metabolism", "Nitrogen metabolism"]];Other;Other	3.34707e-05	0.000104852	0.00967905	0.0150613	0.319219	**
[["Metabolism", "Amino Acid Metabolism", "Lysine biosynthesis"], ["Metabolism", "Amino Acid Metabolism", "Amino acid related enzymes"], ["Metabolism", "Amino Acid Metabolism", "Arginine and proline metabolism"]];Other;Other	0.000209015	0.000647197	0.0041386	0.0139229	0.322955	**
[["Metabolism", "Amino Acid Metabolism", "Lysine biosynthesis"], ["Metabolism", "Amino Acid Metabolism", "Amino acid related enzymes"]];Other;Other	0.000200242	0.000741146	0.000392371	0.00875657	0.270178	***
[["Metabolism", "Amino Acid Metabolism", "Tryptophan metabolism"]];Other;Other	3.44654e-07	7.59609e-05	0.00738972	0.0139229	0.00453726	**
[["Metabolism", "Amino Acid Metabolism", "Valine, leucine and isoleucine degradation"], ["Metabolism", "Carbohydrate Metabolism", "Butanoate metabolism"], ["Metabolism", "Lipid Metabolism", "Fatty acid metabolism"]];Other;Other	6.97387e-05	0.000239877	0.00030633	0.00753065	0.290727	***
[["Metabolism", "Biosynthesis of Other Secondary Metabolites", "Isoquinoline alkaloid biosynthesis"], ["Metabolism", "Amino Acid Metabolism", "Cysteine and methionine metabolism"], ["Metabolism", "Biosynthesis of Other Secondary Metabolites", "Tropane, piperidine and pyridine alkaloid biosynthesis"], ["Metabolism", "Amino Acid Metabolism", "Phenylalanine metabolism"], ["Metabolism", "Amino Acid M…	3.7169e-06	1.44124e-05	0.000524556	0.00849387	0.257895	***
[["Metabolism", "Biosynthesis of Other Secondary Metabolites", "Phenylpropanoid biosynthesis"], ["Metabolism", "Biosynthesis of Other Secondary Metabolites", "Stilbenoid, diarylheptanoid and gingerol biosynthesis"], ["Metabolism", "Biosynthesis of Other Secondary Metabolites", "Flavonoid biosynthesis"], ["Metabolism", "Amino Acid Metabolism", "Phenylalanine metabolism"]];Other;Other	6.59269e-06	1.76625e-05	0.00112387	0.0101576	0.37326	**
[["Metabolism", "Carbohydrate Metabolism", "Amino sugar and nucleotide sugar metabolism"], ["Environmental Information Processing", "Membrane Transport", "Phosphotransferase system (PTS)"], ["Environmental Information Processing", "Membrane Transport", "Transporters"]];Other;Other	3.88942e-05	0.000286323	0.00155733	0.0103327	0.13584	**
[["Metabolism", "Carbohydrate Metabolism", "Amino sugar and nucleotide sugar metabolism"], ["Environmental Information Processing", "Membrane Transport", "Transporters"], ["Environmental Information Processing", "Membrane Transport", "Phosphotransferase system (PTS)"], ["Metabolism", "Carbohydrate Metabolism", "Fructose and mannose metabolism"]];Other;Other	0.000200543	0.00177902	0.00438471	0.0124343	0.112727	**
[["Metabolism", "Carbohydrate Metabolism", "Amino sugar and nucleotide sugar metabolism"], ["Metabolism", "Carbohydrate Metabolism", "Starch and sucrose metabolism"], ["Metabolism", "Carbohydrate Metabolism", "Glycolysis / Gluconeogenesis"], ["Environmental Information Processing", "Membrane Transport", "Transporters"], ["Environmental Information Processing", "Membrane Transport", "Phosphotransf…	7.85153e-06	0.000128297	0.00328301	0.0118214	0.0611983	**
[["Metabolism", "Carbohydrate Metabolism", "Amino sugar and nucleotide sugar metabolism"], ["Metabolism", "Carbohydrate Metabolism", "Starch and sucrose metabolism"], ["Metabolism", "Carbohydrate Metabolism", "Pentose and glucuronate interconversions"], ["Metabolism", "Carbohydrate Metabolism", "Galactose metabolism"]];Other;Other	0.000153109	0.000468736	0.000245699	0.00691769	0.326643	***
[["Metabolism", "Carbohydrate Metabolism", "Amino sugar and nucleotide sugar metabolism"], ["Metabolism", "Carbohydrate Metabolism", "Starch and sucrose metabolism"]];Other;Other	0.000399932	0.00110263	0.000918193	0.00884413	0.362707	***
[["Metabolism", "Carbohydrate Metabolism", "Amino sugar and nucleotide sugar metabolism"]];Other;Other	0.00459276	0.00609122	1.25916e-06	0.000700525	0.753996	***
[["Metabolism", "Carbohydrate Metabolism", "Butanoate metabolism"], ["Metabolism", "Energy Metabolism", "Carbon fixation pathways in prokaryotes"], ["Metabolism", "Carbohydrate Metabolism", "Propanoate metabolism"], ["Metabolism", "Carbohydrate Metabolism", "Citrate cycle (TCA cycle)"], ["Metabolism", "Carbohydrate Metabolism", "Glycolysis / Gluconeogenesis"], ["Metabolism", "Carbohydrate Metabol…	5.92256e-05	0.000390475	0.00229552	0.0107706	0.151676	**
[["Metabolism", "Carbohydrate Metabolism", "Butanoate metabolism"], ["Metabolism", "Metabolism of Cofactors and Vitamins", "Nicotinate and nicotinamide metabolism"]];Other;Other	4.00635e-07	8.77528e-06	0.00689281	0.0121716	0.0456549	**
[["Metabolism", "Carbohydrate Metabolism", "Butanoate metabolism"], ["Metabolism", "Metabolism of Terpenoids and Polyketides", "Terpenoid backbone biosynthesis"], ["Metabolism", "Lipid Metabolism", "Fatty acid metabolism"], ["Metabolism", "Xenobiotics Biodegradation and Metabolism", "Benzoate degradation"], ["Metabolism", "Carbohydrate Metabolism", "Propanoate metabolism"], ["Metabolism", "Carboh…	0.000122688	0.00051717	3.41007e-06	0.00148862	0.23723	***
[["Metabolism", "Carbohydrate Metabolism", "Butanoate metabolism"], ["Metabolism", "Xenobiotics Biodegradation and Metabolism", "Benzoate degradation"]];Other;Other	0.000209921	0.000506031	0.00012349	0.0058669	0.414838	***
[["Metabolism", "Carbohydrate Metabolism", "Butanoate metabolism"], ["Metabolism", "Xenobiotics Biodegradation and Metabolism", "Styrene degradation"]];Other;Other	1.35092e-06	2.64722e-05	0.00135933	0.00928196	0.0510315	**
[["Metabolism", "Carbohydrate Metabolism", "Butanoate metabolism"], ["Metabolism", "Xenobiotics Biodegradation and Metabolism", "Toluene degradation"], ["Metabolism", "Carbohydrate Metabolism", "Citrate cycle (TCA cycle)"], ["Metabolism", "Energy Metabolism", "Carbon fixation pathways in prokaryotes"], ["Environmental Information Processing", "Signal Transduction", "Two-component system"], ["Meta…	0.000125848	0.000932186	0.00498846	0.0113835	0.135003	**
[["Metabolism", "Carbohydrate Metabolism", "C5-Branched dibasic acid metabolism"]];Other;Other	3.57067e-07	2.12642e-06	0.00812382	0.0116462	0.16792	**
[["Metabolism", "Carbohydrate Metabolism", "Citrate cycle (TCA cycle)"], ["Environmental Information Processing", "Signal Transduction", "Two-component system"]];Other;Other	3.01682e-05	0.000187071	0.00306021	0.0107706	0.161266	**
[["Metabolism", "Carbohydrate Metabolism", "Citrate cycle (TCA cycle)"]];Other;Other	5.4804e-06	3.07163e-05	0.00208227	0.00936953	0.17842	**
[["Metabolism", "Carbohydrate Metabolism", "Fructose and mannose metabolism"]];Other;Other	0.0017587	0.0027581	0.00891425	0.0108581	0.637648	**
[["Metabolism", "Carbohydrate Metabolism", "Glyoxylate and dicarboxylate metabolism"], ["Metabolism", "Amino Acid Metabolism", "Glycine, serine and threonine metabolism"], ["Metabolism", "Lipid Metabolism", "Glycerolipid metabolism"], ["Metabolism", "Energy Metabolism", "Methane metabolism"]];Other;Other	0.000105621	0.000367794	6.90993e-05	0.00446585	0.287174	***
[["Metabolism", "Carbohydrate Metabolism", "Glyoxylate and dicarboxylate metabolism"], ["Metabolism", "Carbohydrate Metabolism", "Pyruvate metabolism"]];Other;Other	0.000102097	0.000281817	0.00177558	0.008669	0.36228	**
[["Metabolism", "Carbohydrate Metabolism", "Glyoxylate and dicarboxylate metabolism"], ["Metabolism", "Energy Metabolism", "Carbon fixation pathways in prokaryotes"], ["Metabolism", "Carbohydrate Metabolism", "Butanoate metabolism"]];Other;Other	6.63281e-05	0.000218354	0.00226188	0.0089317	0.303764	**
[["Metabolism", "Carbohydrate Metabolism", "Glyoxylate and dicarboxylate metabolism"], ["Metabolism", "Energy Metabolism", "Methane metabolism"]];Other;Other	9.41377e-05	0.000512529	6.9464e-06	0.00192644	0.183673	***
[["Metabolism", "Carbohydrate Metabolism", "Glyoxylate and dicarboxylate metabolism"]];Other;Other	0.00144391	0.00231183	0.00239964	0.00901926	0.624577	**
[["Metabolism", "Carbohydrate Metabolism", "Inositol phosphate metabolism"]];Other;Other	0.000124685	0.000494318	0.00339552	0.0091944	0.252237	**
[["Metabolism", "Carbohydrate Metabolism", "Pentose and glucuronate interconversions"], ["Metabolism", "Biosynthesis of Other Secondary Metabolites", "Flavone and flavonol biosynthesis"], ["Metabolism", "Carbohydrate Metabolism", "Starch and sucrose metabolism"], ["Metabolism", "Glycan Biosynthesis and Metabolism", "Glycosaminoglycan degradation"], ["Cellular Processes", "Transport and Catabolism…	4.21047e-05	0.000124703	0.00651334	0.00971979	0.33764	**
[["Metabolism", "Carbohydrate Metabolism", "Pentose phosphate pathway"], ["Metabolism", "Carbohydrate Metabolism", "Glycolysis / Gluconeogenesis"], ["Metabolism", "Carbohydrate Metabolism", "Fructose and mannose metabolism"], ["Metabolism", "Energy Metabolism", "Carbon fixation in photosynthetic organisms"]];Other;Other	0.000223299	0.000762343	1.73347e-05	0.00245184	0.292912	***
[["Metabolism", "Carbohydrate Metabolism", "Pentose phosphate pathway"], ["Metabolism", "Carbohydrate Metabolism", "Glycolysis / Gluconeogenesis"]];Other;Other	1.2177e-05	4.32293e-05	0.00685094	0.00954466	0.281685	**
[["Metabolism", "Carbohydrate Metabolism", "Pentose phosphate pathway"], ["Metabolism", "Energy Metabolism", "Carbon fixation in photosynthetic organisms"], ["Metabolism", "Carbohydrate Metabolism", "Glycolysis / Gluconeogenesis"], ["Metabolism", "Carbohydrate Metabolism", "Fructose and mannose metabolism"], ["Organismal Systems", "Endocrine System", "Insulin signaling pathway"], ["Metabolism", "…	7.58643e-06	5.91959e-05	0.0025136	0.008669	0.128158	**
[["Metabolism", "Carbohydrate Metabolism", "Pentose phosphate pathway"], ["Metabolism", "Metabolism of Other Amino Acids", "Glutathione metabolism"]];Other;Other	0.000183665	0.000625306	0.000779522	0.00656743	0.293719	***
[["Metabolism", "Carbohydrate Metabolism", "Pentose phosphate pathway"]];Other;Other	0.00164047	0.00276983	0.000385181	0.00577933	0.592264	***
[["Metabolism", "Carbohydrate Metabolism", "Propanoate metabolism"], ["Metabolism", "Carbohydrate Metabolism", "Pyruvate metabolism"], ["Metabolism", "Xenobiotics Biodegradation and Metabolism", "Styrene degradation"]];Other;Other	7.13651e-06	5.68949e-05	0.00161391	0.00761821	0.125433	**
[["Metabolism", "Carbohydrate Metabolism", "Propanoate metabolism"], ["Metabolism", "Lipid Metabolism", "Fatty acid biosynthesis"], ["Metabolism", "Energy Metabolism", "Carbon fixation pathways in prokaryotes"], ["Metabolism", "Carbohydrate Metabolism", "Pyruvate metabolism"], ["Metabolism", "Metabolism of Terpenoids and Polyketides", "Tetracycline biosynthesis"]];Other;Other	0.00151699	0.00258587	0.00170378	0.00770578	0.586645	**
[["Metabolism", "Carbohydrate Metabolism", "Propanoate metabolism"], ["Metabolism", "Xenobiotics Biodegradation and Metabolism", "Aminobenzoate degradation"], ["Metabolism", "Carbohydrate Metabolism", "Butanoate metabolism"], ["Environmental Information Processing", "Signal Transduction", "Two-component system"]];Other;Other	4.68754e-06	4.7133e-05	0.00368059	0.00849387	0.0994534	**
[["Metabolism", "Carbohydrate Metabolism", "Pyruvate metabolism"], ["Environmental Information Processing", "Signal Transduction", "Two-component system"]];Other;Other	0.0001297	0.000519127	4.14211e-05	0.00341506	0.249842	***
[["Metabolism", "Energy Metabolism", "Carbon fixation pathways in prokaryotes"], ["Metabolism", "Carbohydrate Metabolism", "Butanoate metabolism"]];Other;Other	3.45015e-05	0.000147125	8.2564e-05	0.00394046	0.234505	***
[["Metabolism", "Energy Metabolism", "Carbon fixation pathways in prokaryotes"], ["Metabolism", "Energy Metabolism", "Methane metabolism"]];Other;Other	5.18747e-06	1.93696e-05	0.00134025	0.00700525	0.267814	**
[["Metabolism", "Energy Metabolism", "Nitrogen metabolism"]];Other;Other	0.000501948	0.00247145	2.49544e-05	0.00288967	0.203099	***
[["Metabolism", "Energy Metabolism", "Photosynthesis proteins"]];Other;Other	2.9461e-05	0.000152983	6.42587e-05	0.00350263	0.192577	***
[["Metabolism", "Enzyme Families", "Peptidases"], ["Environmental Information Processing", "Signal Transduction", "Two-component system"]];Other;Other	0.000130315	0.000298693	0.00525036	0.00735552	0.436283	**
[["Metabolism", "Enzyme Families", "Peptidases"], ["Metabolism", "Amino Acid Metabolism", "Alanine, aspartate and glutamate metabolism"], ["Metabolism", "Energy Metabolism", "Nitrogen metabolism"]];Other;Other	0.000280123	0.000900439	4.61599e-06	0.00122592	0.311095	***
[["Metabolism", "Enzyme Families", "Peptidases"], ["Metabolism", "Amino Acid Metabolism", "Phenylalanine metabolism"]];Other;Other	1.07904e-05	5.81975e-05	1.71114e-05	0.00201401	0.185409	***
[["Metabolism", "Enzyme Families", "Peptidases"], ["Metabolism", "Metabolism of Other Amino Acids", "Glutathione metabolism"]];Other;Other	9.42542e-05	0.000384873	1.97766e-05	0.00201401	0.244897	***
[["Metabolism", "Enzyme Families", "Protein kinases"], ["Cellular Processes", "Cell Motility", "Bacterial chemotaxis"], ["Cellular Processes", "Cell Motility", "Bacterial motility proteins"], ["Environmental Information Processing", "Signal Transduction", "Two-component system"]];Other;Other	0.000102889	0.000368612	0.000959047	0.00525394	0.279125	***
[["Metabolism", "Enzyme Families", "Protein kinases"]];Other;Other	0.000204207	0.000626607	2.80695e-05	0.00236427	0.325894	***
[["Metabolism", "Glycan Biosynthesis and Metabolism", "Glycosaminoglycan degradation"], ["Environmental Information Processing", "Signaling Molecules and Interaction", "Bacterial toxins"]];Other;Other	1.44962e-05	6.8487e-05	0.000148301	0.0033275	0.211663	***
[["Metabolism", "Glycan Biosynthesis and Metabolism", "Glycosyltransferases"], ["Metabolism", "Glycan Biosynthesis and Metabolism", "Lipopolysaccharide biosynthesis proteins"]];Other;Other	0.000123777	0.000383113	0.000521094	0.00411559	0.323083	***
[["Metabolism", "Glycan Biosynthesis and Metabolism", "Glycosyltransferases"], ["Metabolism", "Lipid Metabolism", "Glycerolipid metabolism"]];Other;Other	0.000119404	0.00030347	0.00219763	0.00542907	0.393462	**
[["Metabolism", "Glycan Biosynthesis and Metabolism", "Glycosyltransferases"]];Other;Other	0.00022034	0.000719257	0.00232696	0.00551664	0.306344	**
[["Metabolism", "Lipid Metabolism", "Fatty acid metabolism"], ["Metabolism", "Xenobiotics Biodegradation and Metabolism", "Naphthalene degradation"], ["Metabolism", "Xenobiotics Biodegradation and Metabolism", "Chloroalkane and chloroalkene degradation"], ["Metabolism", "Carbohydrate Metabolism", "Glycolysis / Gluconeogenesis"], ["Metabolism", "Xenobiotics Biodegradation and Metabolism", "Metabol…	0.000231875	0.000590936	0.00165126	0.00481611	0.392387	**
[["Metabolism", "Lipid Metabolism", "Glycerolipid metabolism"]];Other;Other	0.000433591	0.00158463	1.98042e-05	0.00183888	0.273622	***
[["Metabolism", "Lipid Metabolism", "Linoleic acid metabolism"], ["Metabolism", "Xenobiotics Biodegradation and Metabolism", "Bisphenol degradation"], ["Metabolism", "Carbohydrate Metabolism", "Fructose and mannose metabolism"], ["Metabolism", "Carbohydrate Metabolism", "Butanoate metabolism"], ["Metabolism", "Xenobiotics Biodegradation and Metabolism", "Chloroalkane and chloroalkene degradation"…	0.00104998	0.00118376	0.00357077	0.00499124	0.886987	**
[["Metabolism", "Metabolism of Cofactors and Vitamins", "One carbon pool by folate"]];Other;Other	0.000219541	0.000690635	3.51967e-06	0.00061296	0.317882	***
[["Metabolism", "Metabolism of Cofactors and Vitamins", "Porphyrin and chlorophyll metabolism"]];Other;Other	0.00578005	0.0132966	1.22175e-07	8.75657e-05	0.434702	***
[["Metabolism", "Metabolism of Cofactors and Vitamins", "Thiamine metabolism"], ["Genetic Information Processing", "Folding, Sorting and Degradation", "Sulfur relay system"]];Other;Other	0.000492916	0.00178272	5.4134e-06	0.000700525	0.276496	***
[["Metabolism", "Metabolism of Cofactors and Vitamins", "Thiamine metabolism"], ["Genetic Information Processing", "Transcription", "Transcription factors"]];Other;Other	4.34176e-06	5.65078e-05	0.00179812	0.00315236	0.0768347	**
[["Metabolism", "Metabolism of Other Amino Acids", "Cyanoamino acid metabolism"], ["Metabolism", "Amino Acid Metabolism", "Phenylalanine metabolism"], ["Metabolism", "Amino Acid Metabolism", "Arginine and proline metabolism"], ["Metabolism", "Xenobiotics Biodegradation and Metabolism", "Styrene degradation"], ["Metabolism", "Xenobiotics Biodegradation and Metabolism", "Aminobenzoate degradation"]…	7.16228e-05	0.000286664	0.000757188	0.00210158	0.249849	***
[["Metabolism", "Metabolism of Other Amino Acids", "Phosphonate and phosphinate metabolism"], ["Metabolism", "Amino Acid Metabolism", "Amino acid related enzymes"]];Other;Other	3.22373e-05	0.000135703	0.00137551	0.00227671	0.237559	**
[["Metabolism", "Metabolism of Other Amino Acids", "Selenocompound metabolism"]];Other;Other	4.37847e-05	0.000446649	0.000351414	0.00157618	0.0980293	***
[["Metabolism", "Metabolism of Other Amino Acids", "beta-Alanine metabolism"], ["Metabolism", "Nucleotide Metabolism", "Pyrimidine metabolism"], ["Metabolism", "Metabolism of Cofactors and Vitamins", "Pantothenate and CoA biosynthesis"], ["Metabolism", "Xenobiotics Biodegradation and Metabolism", "Drug metabolism - other enzymes"]];Other;Other	2.71272e-05	0.000236761	0.000182566	0.00113835	0.114576	***
[["Metabolism", "Metabolism of Terpenoids and Polyketides", "Biosynthesis of siderophore group nonribosomal peptides"]];Other;Other	5.07743e-05	0.000316028	0.00124225	0.00175131	0.160664	**
[["Metabolism", "Metabolism of Terpenoids and Polyketides", "Limonene and pinene degradation"], ["Metabolism", "Xenobiotics Biodegradation and Metabolism", "Bisphenol degradation"], ["Metabolism", "Carbohydrate Metabolism", "Butanoate metabolism"], ["Metabolism", "Xenobiotics Biodegradation and Metabolism", "Naphthalene degradation"], ["Metabolism", "Xenobiotics Biodegradation and Metabolism", "B…	3.07927e-05	0.000277226	0.000716523	0.00131349	0.111074	***
[["Metabolism", "Xenobiotics Biodegradation and Metabolism", "Aminobenzoate degradation"], ["Metabolism", "Carbohydrate Metabolism", "Pyruvate metabolism"]];Other;Other	9.09845e-05	0.00033794	5.05764e-05	0.000350263	0.269233	***
[["Metabolism", "Xenobiotics Biodegradation and Metabolism", "Nitrotoluene degradation"]];Other;Other	0.000142929	0.000598355	7.3727e-05	0.000350263	0.23887	***
[["Organismal Systems", "Environmental Adaptation", "Plant-pathogen interaction"], ["Metabolism", "Lipid Metabolism", "Glycerolipid metabolism"], ["Organismal Systems", "Endocrine System", "PPAR signaling pathway"]];Other;Other	0.000202842	0.00067499	2.80226e-06	8.75657e-05	0.300511	***
False discovery rate (FDR). The false discovery rate at 5% was applied to all tests to correct for multiple testing.
Symbols (*) indicate significant difference (* p < 0.05; ** p < 0.01; *** p < 0.001).
